# State and stimulus dependence reconcile motion computation and the *Drosophila* connectome

Jessica R. Kohn<sup>a,\*</sup>, Jacob P. Portes<sup>a,b,\*</sup>, Matthias P. Christenson<sup>a,b</sup>, LF Abbott<sup>a,b</sup>, Rudy Behnia<sup>a,1</sup>

<sup>a</sup>*Department of Neuroscience, Columbia University*

<sup>b</sup>*Center for Theoretical Neuroscience, Columbia University*

---

## Abstract

Sensory systems dynamically optimize their processing properties in order to process a wide range of environmental and behavioral conditions. However, attempts to infer the function of these systems via modeling often treat system components as having static processing properties. This is particularly evident in the *Drosophila* motion detection circuit, where the core algorithm for motion detection is still debated, and where inputs to motion detecting neurons remain underdescribed. Using whole-cell patch clamp electrophysiology, we measured the state- and stimulus-dependent filtering properties of inputs to the OFF motion-detecting T5 cell in *Drosophila*. Simply summing these inputs within the framework of a connectomic-constrained model of the circuit demonstrates that changes in the shape of input temporal filters are sufficient to explain conflicting theories of T5 function. Therefore, with our measurements and our model, we reconcile motion computation with the anatomy of the circuit.

---

## 1 Introduction

2 Flies walk, fly, pursue mates, and search for food in diverse environmental and behavioral  
3 conditions, using only limited visual circuitry. How does this small, hardwired ensemble of  
4 neurons interpret such a wealth of constantly fluctuating visual information? A rich set  
5 of studies has demonstrated that sensory neurons encode the physical world dynamically,  
6 changing their filtering properties to suit varying sensory statistics [1, 2, 3]. However, despite  
7 evidence that cellular inputs to *Drosophila* motion detectors are capable of changing their  
8 processing properties [4, 5, 6], the circuit is frequently modeled as relying on inputs with  
9 static filters [4, 7, 8, 9, 10]. In this work, we use high-temporal resolution whole-cell patch  
10 clamp electrophysiology and modeling to ask two sets of questions. First, to what extent  
11 do the processing properties of inputs to *Drosophila* motion detectors change with varying  
12 visual statistics and behavioral states? In other words, do specific stimuli or states elicit more

---

\*equal contribution

<sup>1</sup>corresponding author: rb3161@columbia.edu

13 complex filtering waveforms? And second, given a dynamic input parameter space, can we  
 14 define the fundamental computational motif underlying *Drosophila* direction selectivity?

15 In the *Drosophila* visual system, T4 and T5 are the first direction selective neurons  
 16 (Figure 1A). They feed into multiple downstream pathways that control critical behaviors  
 17 that depend on motion detection, such as course control [11], walking speed [12], and escape  
 18 from looming stimuli [13]. T4 responds to ON motion while T5 is specific to OFF motion,  
 19 with individual neurons of both types preferentially responding to local motion in one of four  
 20 directions [14, 15, 7, 8]. We focused on the OFF pathway, where T5 receives columnar input  
 21 (i.e. corresponding to one pixel in the field of view of the animal) from medulla cells Tm1,  
 22 Tm2 and Tm4 in one column and from slower Tm9 cells in an offset, neighboring column  
 23 (Figure 1A) [16, 17, 4, 18]. The connections between non-direction selective medulla cells and  
 24 direction selective T5 cells constitute the locus of OFF motion computation [16, 17, 4, 18].

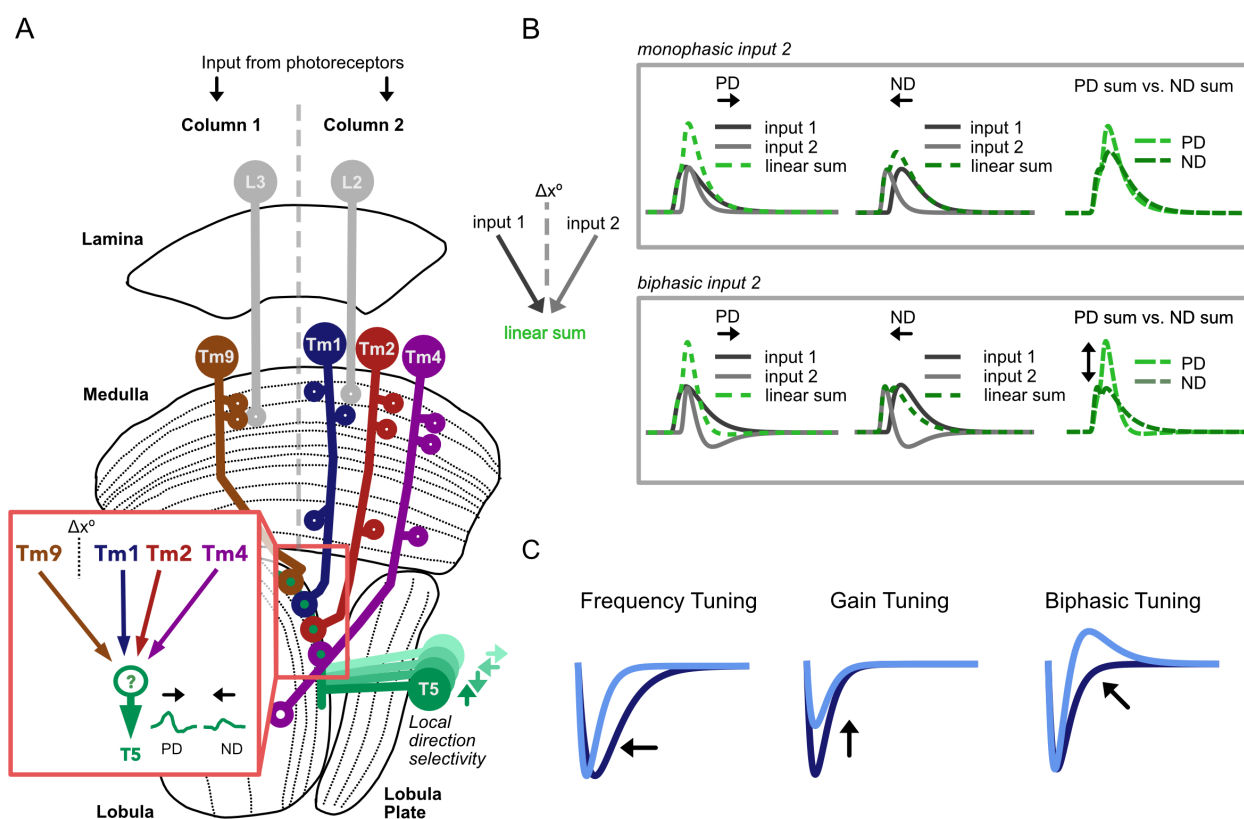

Figure 1: **Motion detection in the *Drosophila* OFF Pathway** **A.** The connectome of the *Drosophila* OFF motion pathway is well characterized. *Inset:* T5s receive columnar input from Tm1, Tm2, Tm4 and Tm9. Tm1, Tm2, Tm4 (postsynaptic to lamina monopolar cell L2), and look at the same point in space. They are spatially offset ( $\Delta x^\circ$ ) from Tm9 (postsynaptic to L3). Voltage responses in T5 are direction selective, depolarizing more strongly to motion in the preferred direction (PD) than to motion in the opposite, null direction (ND). The mechanisms underlying the emergence of these signals in T5 are debated. **B.** Filter shape can have a strong effect on the output of a motion detector. The linear combination of two spatially offset excitatory inputs, one of which is biphasic (*bottom*), can effectively suppress ND responses, generating an output that is more direction selective than the sum of two monophasic inputs (*top*). **C.** The temporal processing properties of sensory neuron filters have been shown to be stimulus and/or state dependent, varying in frequency, gain, and biphasic tuning.

25 Current models of direction selectivity at the level of T5 rely on a direct source of columnar  
26 inhibition, which is not supported by electron microscopy data [19, 18]. Furthermore,  
27 recent studies disagree on the fundamental computation underlying direction selectivity in  
28 T5, and argue for either a linear [20] or a nonlinear mechanism [4, 8]. However, these studies  
29 use different visual stimuli to probe the response properties of T5. We wondered whether  
30 the differences in stimuli between these studies could explain their disparate conclusions. In  
31 particular, since the temporal filtering properties of inputs to T5 govern the specificity and  
32 tuning of T5 output, differences in their shapes, which could be induced by different experi-  
33 mental paradigms, could drastically alter T5 responses. Most models of T5 do not measure  
34 input responses properties, and instead use simple monophasic (low-pass) temporal filters  
35 as inputs. However, linearly combining two spatially separated inputs, when one is biphasic  
36 (band-pass), can enhance direction selective responses (Figure 1B). It is therefore plausible  
37 that more complex spatiotemporal receptive fields in inputs can account for T5 direction  
38 selective responses, even in the absence of direct inhibition. Here we test this hypothesis by  
39 measuring stimulus- and state-dependent responses of the four main T5 columnar inputs.

40 Previous work has demonstrated changes in frequency tuning [4] and contrast gain adap-  
41 tation [5, 6] at the level of T5 inputs. In order to look for signatures of changes to band-pass  
42 or “biphasic” tuning (Figure 1C), we used whole-cell patch clamp electrophysiology to record  
43 Tm1, Tm2, Tm4 and Tm9 responses to visual stimuli with a range of statistical properties.  
44 We also asked how stimulus-dependent properties might change in the presence of the neuro-  
45 modulator octopamine (OA), which is known to affect *Drosophila* motion circuits [21, 22, 4].  
46 We found that the temporal properties of columnar inputs to T5 display stimulus- and state-  
47 dependent changes in filtering waveforms, including instances of strong biphasic responses.  
48 We used these stimulus- and state-dependent properties to characterize a “parameter space”  
49 for the filtering properties of the *Drosophila* motion vision circuit, through which these prop-  
50 erties adjust dynamically to process changing visual statistics. We then linked the stimulus-  
51 and state-dependent responses of these inputs to previously measured T5 responses using a  
52 framework based on the *Drosophila* optic lobe connectome. Our model, based on a summa-  
53 tion of the measured responses of excitatory OFF pathway medulla cell inputs, effectively  
54 recapitulates previously reported T5 responses when the model is adjusted to account for  
55 visual stimuli statistics. As such, our functionally and anatomically constrained model ex-  
56 plains direction selectivity in T5 without the need for direct columnar inhibition. These  
57 results highlight the complex nature of this simple circuit, which endows an anatomically  
58 restricted set of neurons with the ability to encode a large space of stimuli, and shows that  
59 the question of mechanisms underlying direction selectivity is intimately intertwined with  
60 that of stimulus and state dependence.

## 61 Results

### 62 Filtering properties of columnar T5 inputs in response to a white noise stimulus

63 Linear-nonlinear (LN) models are widely employed to characterize spatiotemporal pro-  
64 cessing properties of individual cells in sensory systems [23, 24, 15, 4]. Following this ap-  
65 proach, we first aimed to extract the linear spatiotemporal filters and associated nonlin-  
66 earities that best describe the responses of Tm1, Tm2, Tm4 and Tm9 to a white noise

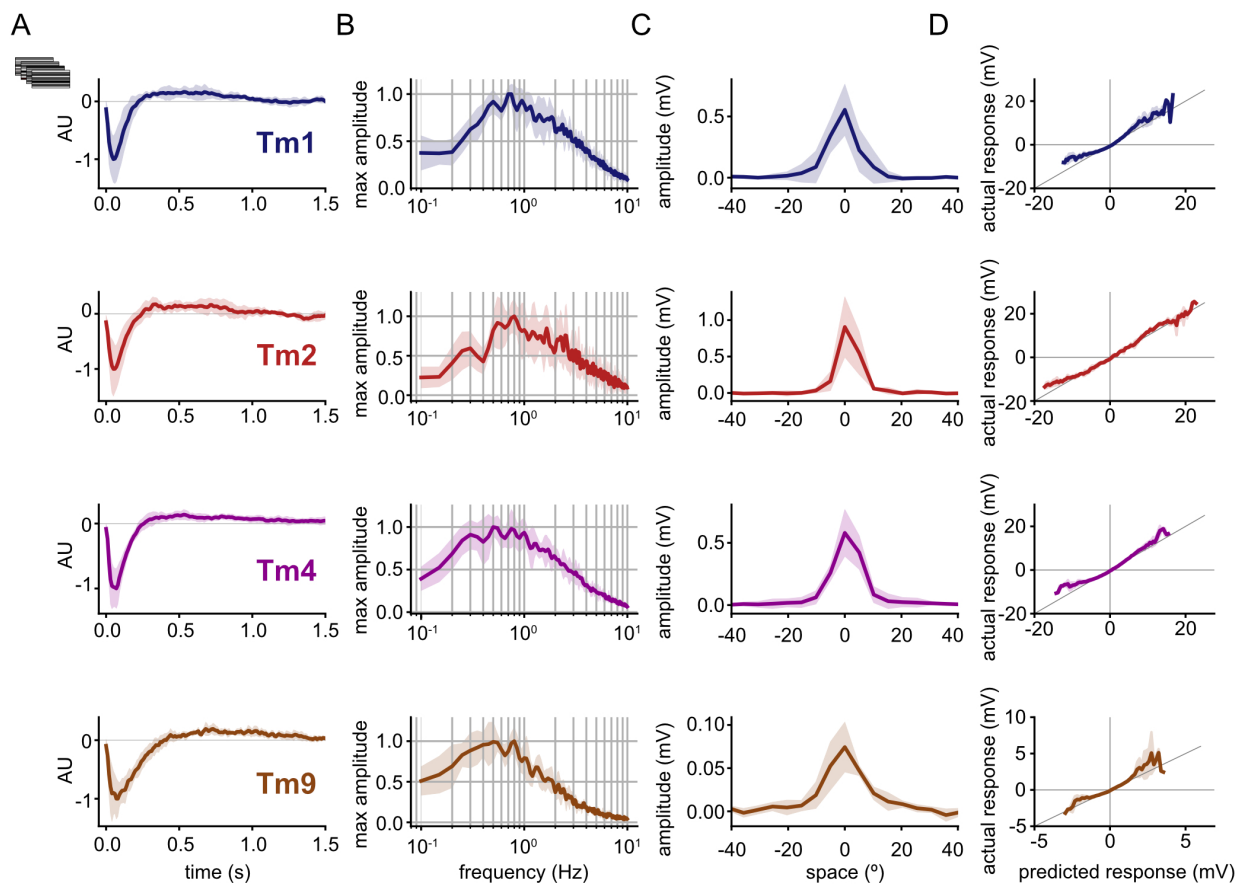

Figure 2: **Tm1, Tm2, Tm4 and Tm9 exhibit spatial and temporal tuning with white noise stimuli** **A.** Normalized mean temporal filters for Tm1 (n=7), Tm2 (n=4), Tm4 (n=6), and Tm9 (n=6) extracted via white noise analysis. Filters show slight biphasic profiles. Shaded area represents standard deviation. **B.** Normalized mean frequency tuning of temporal filters when linearly convolved with sine waves of increasing temporal frequency. While all four Tm neurons are band-pass, Tm9 shows slower tuning than Tm1, Tm2 and Tm4. **C.** Mean spatial receptive fields extracted from spatiotemporal filters. **D.** Static nonlinearities for each cell type are linear for small voltage changes, but rectified at the upper and lower boundaries of their dynamic range.

67 stimulus, consisting of 5° horizontal bars (Figure 2 and Figure S1). From cellular responses  
 68 to this stimulus, we extracted linear spatiotemporal receptive fields via reverse correlation  
 69 [23, 25, 24, 4] and separated them into spatial and temporal components (Figure 2A-C). Our  
 70 white noise results are in overall agreement with previous studies [24, 26, 17, 15, 4].

71 As expected, the linear temporal filters of all columnar OFF-pathway inputs to T5 consist  
 72 primarily of a negative lobe, indicating a sign-inversion between contrast polarity and cellular  
 73 response (Figure 2A). The peak response times of our four filters are shorter than those  
 74 reported by calcium imaging studies [4], and fall within a similar range to those found in  
 75 previous studies of Tm1 and Tm2 using the higher temporal resolution techniques of either  
 76 electrophysiology or voltage imaging [24, 27]. In the frequency domain, Tm1, Tm2, and Tm4  
 77 exhibit clear band-pass filtering properties, as previously noted [17, 4]. These band-pass  
 78 properties correspond to the slight biphasic character of their linear temporal filters, which

79 have shallow second positive lobes. In contrast to results obtained with calcium imaging,  
80 which determined that Tm9 is low-pass [26, 17, 4], we find that Tm9 also exhibits band-pass  
81 filtering properties (Figure 2B), albeit weaker than the other columnar inputs. Recording  
82 responses to long, 10 s flashes of light confirmed that these neurons are indeed band-pass as  
83 their responses return to baseline during the course of the stimulation (Figure S2).

84 We find that Tm1, Tm2, and Tm4 have narrow spatial receptive fields comprising approx-  
85 imately  $10.8^\circ$ ,  $8.2^\circ$ , and  $11.3^\circ$  full width at half maximum (FWHM) when fit with Gaussians  
86 (Figure 2C, see Methods) [17, 4]. Tm9 has a slightly wider receptive field of approximately  
87  $15.3^\circ$  FWHM [17, 4]. We found an additional subset of Tm9 cells that respond across a  
88 wide region of approximately  $69.7^\circ$  FWHM (Figure S3), as previously reported [26]. Tm9  
89 responses fall naturally into two distinct populations based on their spatial receptive fields;  
90 however, with regards to their temporal properties, the two types of Tm9 responses are  
91 not distinct from each other (Figure S3). We therefore based our characterization of Tm9's  
92 spatial properties on the population with narrower receptive fields, as these more closely  
93 matched the EM receptive field prediction from Shinomiya et al. [18]. Across cell types, we  
94 did not find center-surround structure in the spatial receptive fields extracted from our white  
95 noise stimulus (Figure 2C).

96 The static nonlinearities extracted from this dataset show that all four columnar T5 in-  
97 puts respond linearly for small deflections in their membrane potential, but nonlinearly at the  
98 upper and lower boundaries of their dynamic ranges, with greater-than-linear depolarization  
99 amplitudes, and less-than-linear hyperpolarization amplitudes (Figure 2D). For stimuli that  
100 cause small deflections, the static nonlinearity only slightly improves fits (Figure S1). The  
101 contribution of static nonlinearity is more prominent with stimuli that cause large deflections  
102 such as high contrast flashes, where the negative components of the responses have lower  
103 amplitudes than the positive components (Figure S2). While this partial rectification is in  
104 line with previous studies for Tm1 and Tm2 [24, 27], calcium imaging studies have reported  
105 complete rectification for Tm1, Tm2 and Tm4 and a more linear response in Tm9 [17], in  
106 contrast to our findings.

107 These temporal and spatial filters, along with their associated static nonlinearities, offer  
108 a description of how Tm inputs to T5 process a white noise stimulus. But are they able to  
109 predict the responses of these neurons to stimuli with different visual statistics? To answer  
110 this question, we next recorded the responses of Tm1, Tm2, Tm4 and Tm9 to other types  
111 of visual stimuli that varied in time and contrast.

## 112 **Temporal processing of columnar inputs to T5 is stimulus dependent**

113 We first recorded the response of the four columnar inputs to T5 to short full field  
114 brightness decrements of varying durations from a mean of grey. This type of stimulus has  
115 been previously used in the *Drosophila* motion detection circuit to characterize the response  
116 properties of Tm1 and Tm2 [27], as well as circuit output at the level of T5 [8]. Our aim was  
117 to compare these “flash” responses to predictions made from white noise filters. We measured  
118 the responses of Tm1, Tm2, Tm4, and Tm9 to high contrast flashes of 20, 40, 80, and 160 ms,  
119 and found that these did not match the output of our LN spatiotemporal white noise filters  
120 convolved with same stimuli (see Methods). These discrepancies appeared in both the shape  
121 and amplitude of the responses (Figure 3A). More specifically, we found Tm1 and Tm4

122 flash responses to be more biphasic than the corresponding white noise filter predictions  
123 across the four flash durations. Tm2 flash responses are more similar to the white noise  
124 prediction but also display a more biphasic response for 40 ms flashes. Furthermore, we find  
125 that the amplitude of the negative lobe of flash responses remains constant across stimulus  
126 durations for Tm1, Tm2, and Tm4. Shape-wise, Tm9 responses do not change significantly.  
127 Additionally, the gain of all Tm cell flash responses increases with flash duration. For Tm1,  
128 Tm2 and Tm4, white noise filter predictions of 20 and 40 ms flashes underestimate actual  
129 amplitudes of responses to flash stimuli, highlighting nonlinearities in gain at these shorter  
130 time scales. These comparisons indicate that temporal filters extracted in response to white  
131 noise are poor predictors of Tm1, Tm2, Tm4, and Tm9 responses to high-contrast flashes.  
132 In particular, the temporal responses of Tm1 and Tm4 are more biphasic under the latter  
133 stimulus conditions.

134 We then sought to understand which statistical parameters of the stimulus drive the  
135 changes in response shape. The white noise stimulus, which changes contrast every 50 ms,  
136 falls within the same range of timescales as the flashes. However, a key difference between the  
137 white noise and flash stimuli is the magnitude of the contrast change. While the white noise  
138 stimulus consists of a truncated Gaussian distribution around the mean luminance of the  
139 projector (see Methods), the flash is a full contrast decrement from the same mean baseline  
140 luminance. Thus, a given contrast change for the white noise stimulus is, on average, smaller  
141 than that of the flash stimulus. To investigate the degree to which contrast could account  
142 for the change in biphasic properties of medulla cells, we measured responses of Tm neurons  
143 to flashes of lower contrast, starting at the same mean luminance level. We found that Tm1,  
144 Tm2, and Tm4 responses to flashes in low-contrast regimes lost their biphasic character,  
145 and more closely matched the white-noise filter predictions, both in terms of amplitude and  
146 waveform (Figure 3B). In the case of Tm9, which is only minimally biphasic to white noise,  
147 the response shape did not change significantly at different contrasts (Figure 3B, *right*). In  
148 general, high contrast flash responses are more biphasic than white noise responses, while  
149 low contrast flash responses are more comparable to white noise responses. We therefore find  
150 that the extent of contrast change of a flash stimulus is one factor in evoking the biphasic  
151 character of columnar T5 input responses.

152 We then asked if the results found using flash responses translate directly to a noise  
153 stimulus - i.e. does changing the contrast of a noise stimulus also affect the shape of extracted  
154 temporal filters? To answer this question, we recorded the responses of Tm1 to both high and  
155 low contrast ternary noise stimuli (Figure S4), consisting of random transitions between the  
156 mean luminance of the projector and fixed contrast increments/decrements of either high or  
157 low contrast, with the same temporal properties as the white noise. We find that Tm1 filters  
158 extracted from low and high contrast ternary noise have similar shapes to each other, as  
159 well as to the Tm1 filter extracted from white noise, presenting only as moderately biphasic.  
160 While we did not see a change in the shapes of filters, we did find that the amplitude of  
161 the temporal filter, or the gain, does increase with decreasing contrast, corresponding to an  
162 amplification of smaller signals that allows the cell to produce the same amplitude responses  
163 in different contrast regimes. Similarly, filters extracted from Tm2 and Tm4 responses to  
164 the high contrast ternary stimulus did not differ significantly in shape from filters extracted  
165 from the white noise stimulus (which was lower contrast), but had lower gains. While this  
166 finding is similar to that of Drews et al. [6] and differs from Matulis et al. [5], it confirms

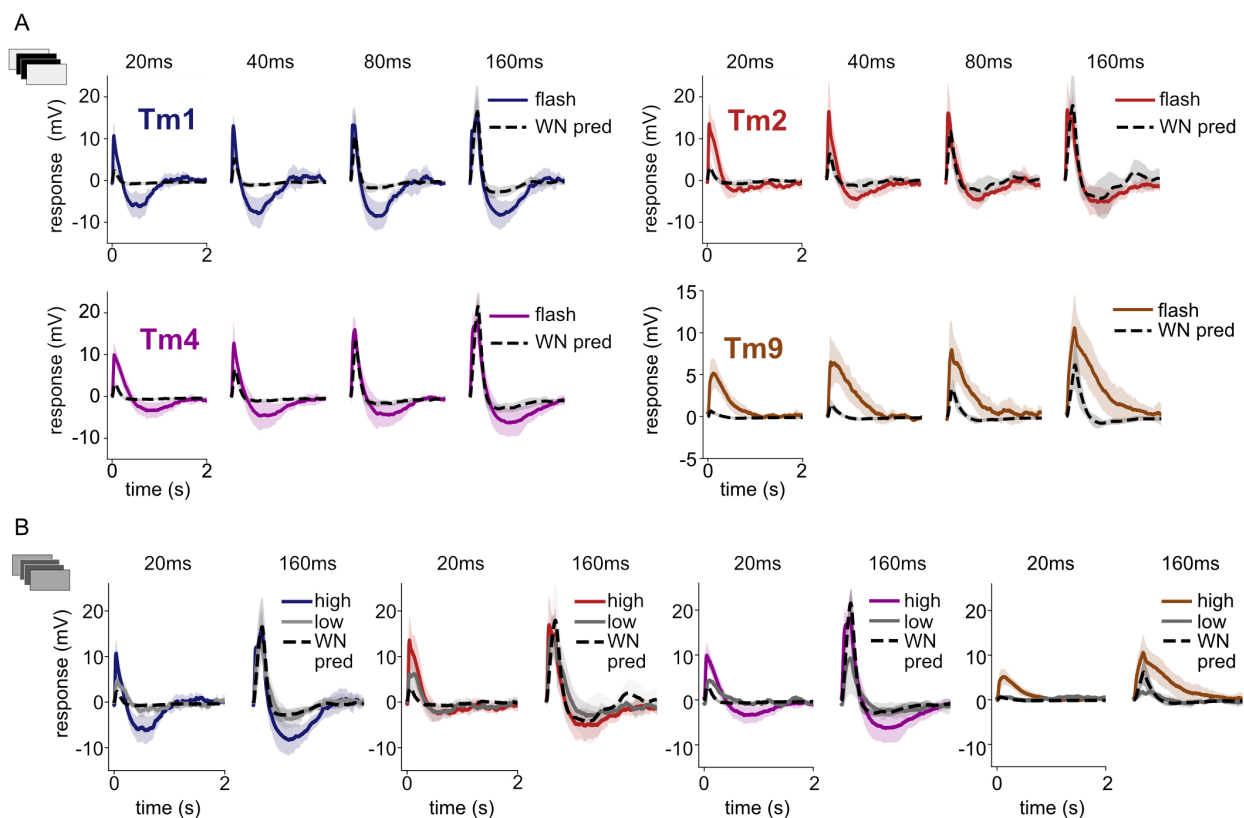

Figure 3: **Tm1, Tm2, Tm4 and Tm9 responses are stimulus dependent** **A.** Mean Tm responses to 20, 40, 80 and 160 ms high contrast flashes (colored lines) are biphasic. Mean white noise filter predictions for the same 20, 40, 80 and 160 flashes (black, dashed lines) capture depolarization dynamics, but do not predict hyperpolarization for all flash durations, and under-predict depolarization amplitude for 20 and 40 ms flashes. Tm1 (n=4-5), Tm2 (n=5), Tm4 (n=5-6), and Tm9 (n=4-6). Tm9 white noise predictions fail to capture both depolarization amplitude and slower dynamics of Tm9 responses. Shaded area represents standard deviation. **B.** Mean Tm responses to 20 ms and 160 ms low contrast (grey) and high contrast flashes (color, same data as in B). Low contrast flashes do not elicit biphasic responses and are closer in shape to white noise predictions from A. Tm1 (n=4-5), Tm2 (n=4-5), Tm4 (n=1-2), and Tm9 (n=1-2).

167 that a noise stimulus can indeed elicit changes in processing properties (i.e. gain) when its  
 168 contrast statistics are modulated. However, when these results are considered in combination  
 169 with responses to low contrast flash stimuli, which operate within similar contrast regimes,  
 170 it becomes apparent that the shape of a temporal filter is stimulus dependent in a manner  
 171 that is not only linked to contrast (see Discussion).

172 These results show that the temporal properties of columnar inputs to T5 are stimulus  
 173 dependent and cannot be extracted using a single stimulus type or be fully described by a  
 174 single temporal filter. Specifically, our data show that the shape of Tm1, Tm2, Tm4 and  
 175 Tm9 responses are dependent on the statistics of the stimuli presented. In particular, specific  
 176 stimuli can elicit strong biphasic temporal responses in Tm1, Tm2 and Tm4.

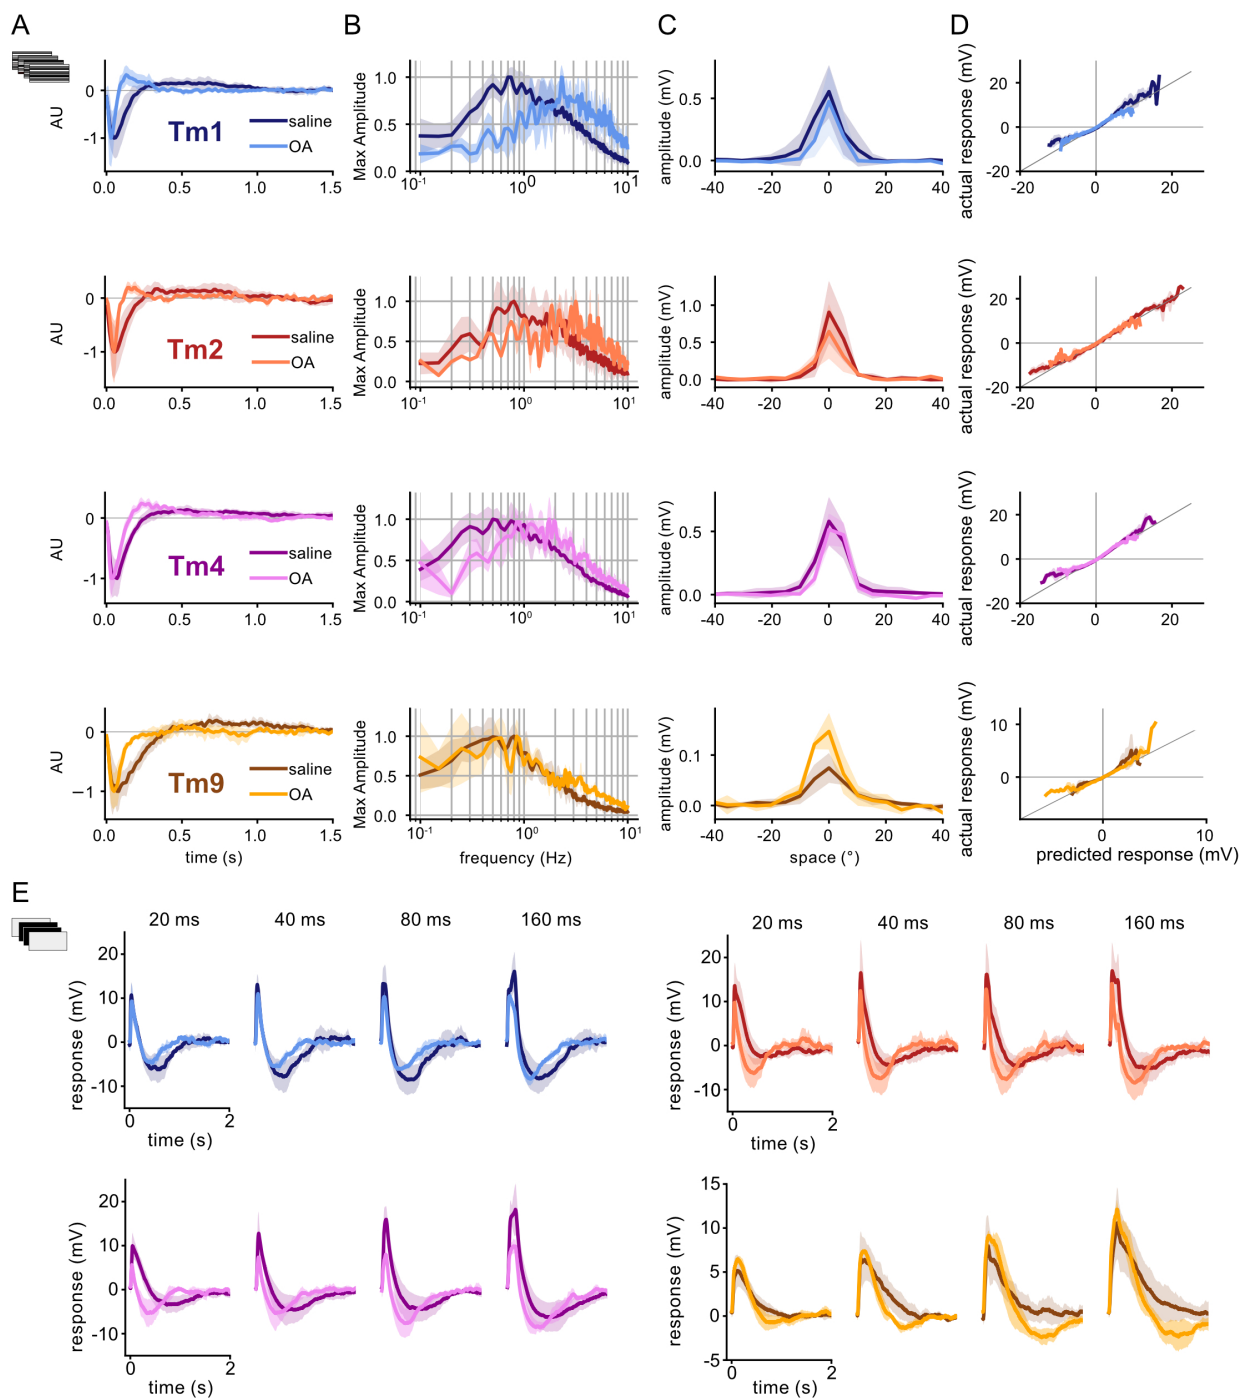

Figure 4: **Tm1, Tm2, Tm4 and Tm9 exhibit stimulus and state dependence in presence of neuromodulator octopamine (OA)** Responses in presence of OA (lighter colors) are overlaid with data from Figures 2-3 (darker colors) **A.** Temporal filters extracted from white noise stimulus show distinct changes in shape, with a faster and narrower first lobe and the emergence of a sharp second lobe in the case of Tm1, Tm2 and Tm4 in OA. **B.** In frequency space, Tm1, Tm2 and Tm4 filters in the presence of OA show distinct shifts in tuning to higher frequencies. Tm9 tuning does not change. **C.** There are no significant changes in spatial filters +/- OA. **D.** There are no significant changes in static nonlinearities between conditions. **E.** Tm1 (n=3-4), Tm2 (n=3), Tm4 (n=3-4), and Tm9 (n=2-3) responses to flashes (20, 40, 80, 160 ms) are faster and, in most instances, more biphasic in OA.



## 177 **Temporal processing of columnar inputs to T5 is state dependent**

178 Exploring stimulus-dependent changes in processing revealed that inputs to T5 change  
179 their filtering properties in response to different visual stimuli. Are the changes in stimuli  
180 able to capture the full range of response properties that these cells can generate? To answer  
181 this question, we next investigated state-dependent changes, which have also been found to  
182 dramatically affect the encoding properties of sensory neurons through the action of small  
183 molecule neuromodulators [28, 29, 30]. The neuromodulator octopamine (OA), released  
184 during locomotion, has been found to change the gain and frequency tuning of T4 and T5  
185 cells as well as downstream lobula plate tangential cells (LPTCs) [21, 22, 4]. These changes  
186 are likely inherited in part through the modulation of columnar transmedullary inputs to  
187 these circuits. Indeed, Arenz et al. [4] report an acceleration of the responses of inputs to T4  
188 and T5 with application of CDM, an OA agonist. We therefore investigated how these state-  
189 dependent changes in processing properties compare with the stimulus-dependent changes  
190 that we observed, and whether any relationship could be drawn between the two.

191 We conducted recordings in the presence of the neuromodulator OA, and found that  
192 the application of 10  $\mu$ M OA induced a strongly biphasic white noise extracted temporal  
193 filter in Tm1, Tm2 and Tm4, with a sharp, positive second lobe emerging (Figure 4A).  
194 Corresponding to the emergent biphasic character induced in each cells' linear temporal filter,  
195 responses are more band-pass with OA. In addition, OA induces faster temporal filter peaks  
196 for Tm1, Tm2 and Tm4. This latter effect, also apparent in Arenz et al. [4], manifests in the  
197 frequency domain as a shift toward higher frequencies (Figure 4B). The frequency tuning  
198 of Tm9 does not change significantly in the presence of OA (Figure 4A-B). As previously  
199 noted by Arenz et al. [4], the application of OA did not exert any significant effect on  
200 the spatial receptive fields of any columnar T5 input (Figure 4C). Additionally, while the  
201 application of OA reduces the gain of these cells, it does not appear to significantly change  
202 their static nonlinearities (Figure 4D). This reduced dynamic range in the presence of OA  
203 likely prevents them from reaching response amplitudes at which nonlinear processing effects  
204 are seen (Figure 4D).

205 We next asked how the effect of OA interacts with the stimulus-dependent changes in  
206 processing properties we had previously observed in columnar T5 inputs, and assessed the  
207 effect of OA on responses to flash stimuli. In addition to having faster kinetics, flash re-  
208 sponses in the presence of OA were more biphasic for all four cells as compared to saline  
209 conditions (Figure 4E). The corresponding white noise predictions made using the temporal  
210 filters extracted in OA are poor predictors of these flash responses (Figure S5A). Similar to  
211 saline conditions, low contrast flashes produced less biphasic responses than high contrast  
212 (Figure S5B); however, low and high contrast flashes in OA are both more biphasic than  
213 those measured in saline. This reveals a nuanced relationship between state- and stimulus-  
214 dependent changes to processing properties, where state and stimulus can elicit similar shifts  
215 both independently or in tandem with one another.

216 Neuromodulation therefore has a strong effect on the shape of the temporal responses of  
217 columnar inputs to T5. In OA, the temporal properties of Tm1, Tm2 and Tm4 not only  
218 become faster, shifting their tuning towards higher temporal frequencies, but also display  
219 changes in the waveforms of their temporal filters, which become more biphasic.

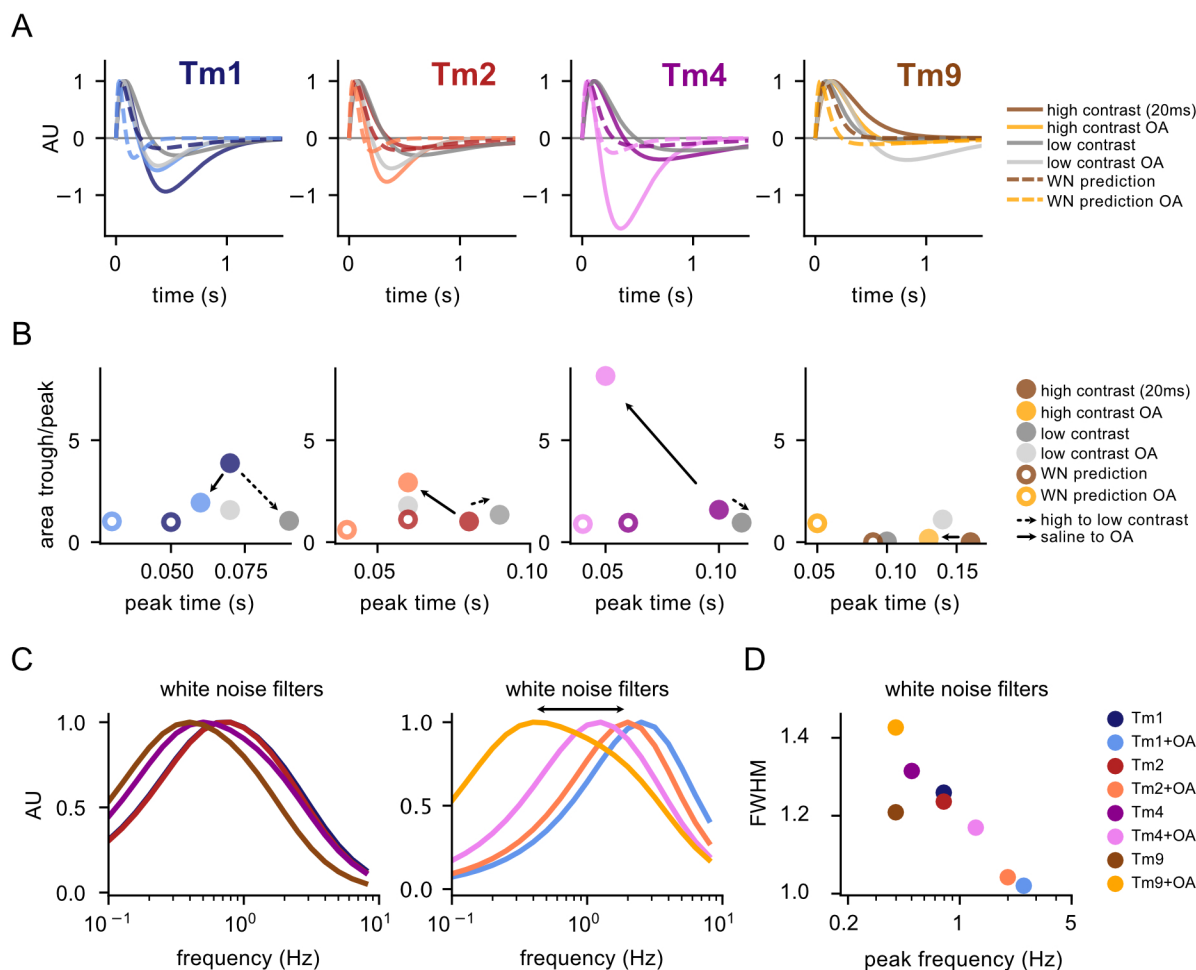

Figure 5: **Tm1, Tm2, Tm4 and Tm9 temporal responses lie within a parameter space** **A.** Comparison of parameterized Tm1, Tm2, Tm4 and Tm9 responses to 20 ms flashes across conditions, including high contrast and high contrast with OA (solid colored lines), low contrast and low contrast with OA (grey lines), and both baseline and OA LN white noise filter predictions for 20 ms stimuli (dashed lines). **B.** The parameterized responses from A are plotted as a function of peak time (x-axis) vs. the ratio of the area of the peak lobe with respect to the trough lobe (y-axis). **C.** Frequency tuning of parameterized baseline (left) and OA temporal filters (right). Filters in OA become more band-pass and shift their peaks to higher frequencies (black arrow). **D.** Full width half max (FWHM) as a function of temporal frequency of filters in C.

220 **T5 columnar temporal responses move across a continuous stimulus- and state-**  
 221 **dependent parameter space**

222 The similarities between shape changes in the temporal responses of T5 columnar inputs  
 223 to either high contrast flashes or to responses measured in the presence of OA hinted at  
 224 a continuum of responses rather than discrete differences (Figure 5A-D). To describe this  
 225 stimulus- and state-dependent “parameter space” of responses for each of the inputs to  
 226 T5, we compared all stimulus and state conditions on a similar temporal timescale, using  
 227 parameterized responses (Figure S6, see Methods).

228 We focused on responses to a 20 ms flash stimulus, either measured directly or predicted

229 from white noise filters across all Tm cells, in the absence and the presence of OA. Normalized  
230 and plotted together (Figure 5A), it is clear that Tm1, Tm2 and Tm4 exhibit a wide range  
231 of responses, while Tm9 shows somewhat fewer changes across stimuli and state. To better  
232 visualize how different conditions affect these responses, we plotted the ratio of the area of  
233 the trough by the area of the peak as a function of peak time, roughly representing the  
234 extent of a filter’s biphasic character as a function of speed of response (Figure 5B). The 2D  
235 space occupied by the Tm neurons within this plot illustrates the span of the diversity of  
236 responses within cell types and reveals global trends: responses move from being less to more  
237 biphasic between noise and flash stimuli, and shift toward being faster and more biphasic in  
238 the presence of OA. In the case of white noise filters, the effect of OA is particularly clear  
239 in the frequency domain (Figure 5C). In the case of Tm1, Tm2, and Tm4, OA shifts peak  
240 responses towards higher frequencies so that their frequency tuning curves are spread further  
241 from each other (and thus across a broader spectrum of frequencies) compared to saline  
242 conditions. Additionally, OA decreases the tuning curve FWHM values, thereby making the  
243 OA filters more band-pass (Figure 5D).

244 High temporal resolution electrophysiological recordings of Tm1, Tm2, Tm4 and Tm9  
245 under different stimuli and neuromodulatory conditions reveal a highly flexible circuit with  
246 the ability to display changes in temporal filter shape. We next investigated the computa-  
247 tional consequences of these stimulus- and state-dependent properties.

## 248 **A sum of columnar inputs predicts T5 flash responses**

249 Recently, Gruntman et al. [8] obtained whole-cell patch clamp recordings of T5 responses  
250 to stationary high contrast flashing bars. The authors found T5 to display asymmetric  
251 hyperpolarizing responses. For any particular T5 cell, flashing bars on the side of the spatial  
252 receptive field corresponding to the leading edge of the cell’s preferred direction of motion  
253 elicited only a depolarizing response. Bars on the opposite side of the receptive field, however,  
254 caused a depolarization followed by a hyperpolarization. To explain these results, the authors  
255 propose a direction selective model in which the functional properties of T5 can be explained  
256 by a combination of direct columnar excitation and inhibition. Since no such columnar  
257 inhibitory input has been found by connectome studies [18], we instead hypothesized that  
258 the strongly biphasic nature of the temporal responses of Tm1, Tm2 and Tm4 to flashes  
259 could explain T5 responses without the need for a direct inhibitory input. Because Tm1,  
260 Tm2, and Tm4 have similar processing properties (Figure 2D-G) and look at the same point  
261 in space [18], we asked whether a single biphasic excitatory columnar input combined with  
262 Tm9 via linear regression could capture the dynamics of the T5 response, and the asymmetric  
263 hyperpolarization in particular.

264 We used our measured responses of Tm1 and Tm9 to predict T5 responses to station-  
265 ary high contrast flashing bars without additional manipulation. To compare our data with  
266 existing T5 data, we first convolved the white-noise extracted linear temporal filter of each  
267 cell type with a 1D stimulus of length 20, 40, 80 and 160 ms [7, 8]. Using linear regression  
268 with positivity constraints, we fit these predicted responses to T5 flash responses collected  
269 by Gruntman *et al.*[8]. As expected from their shape, we found that the white noise fil-  
270 ter predictions were able to capture the depolarizing responses, but failed to capture the  
271 asymmetric hyperpolarization (Figure 6A, *top*).

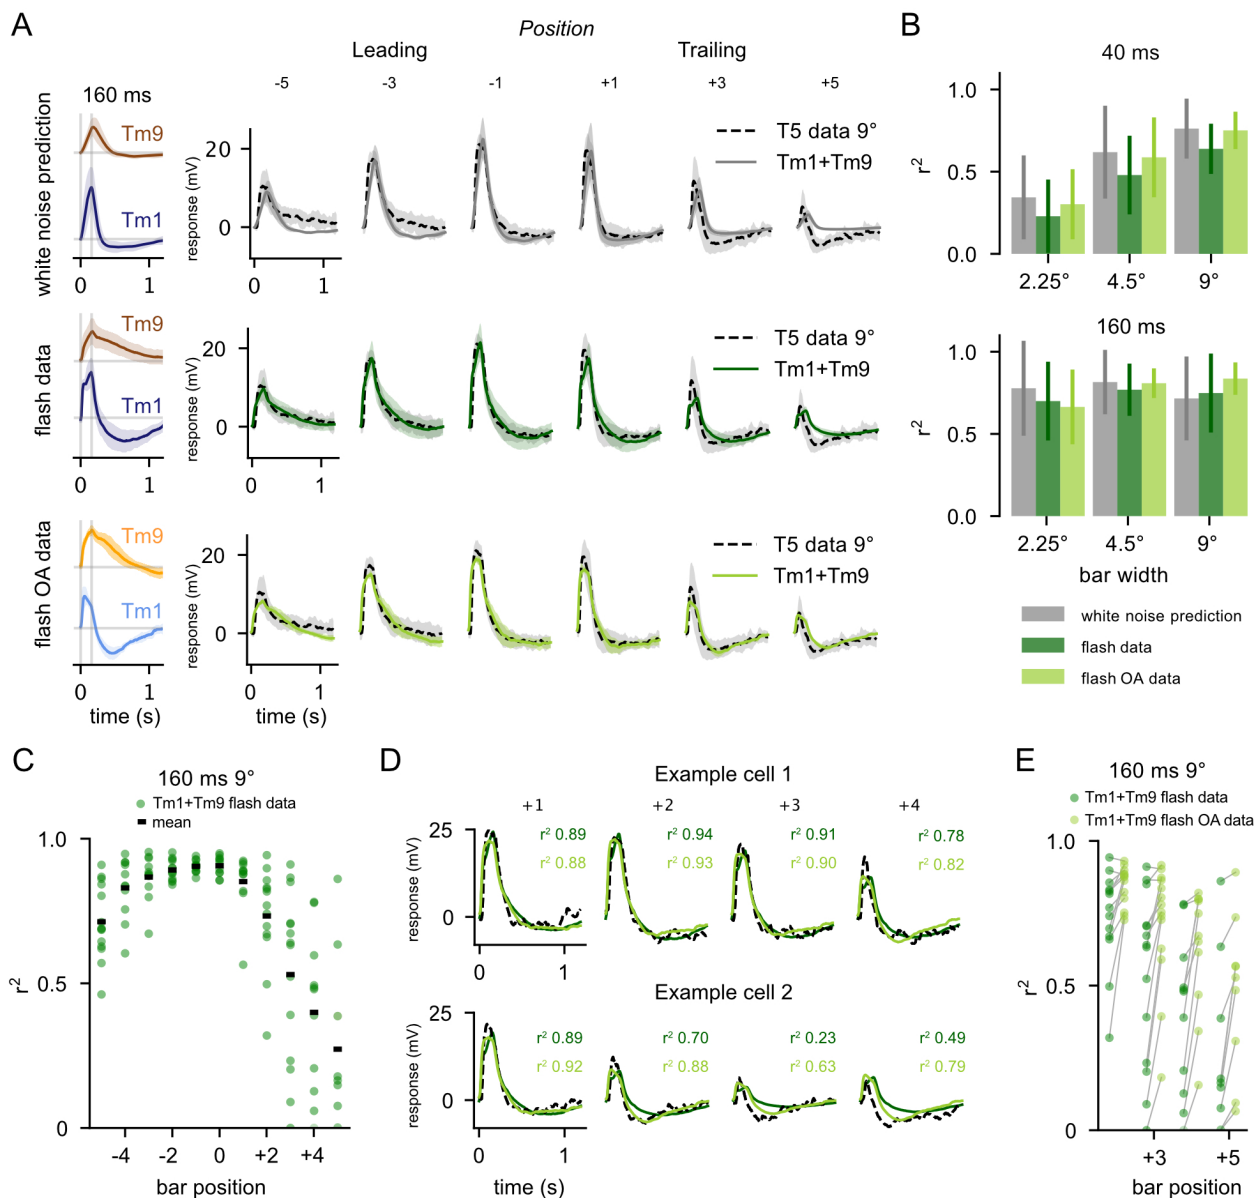

**Figure 6: The sum of columnar inputs predicts T5 flash responses** **A. Top:** White noise extracted filters are convolved with 160 ms stimulus and then fit with linear regression to T5 electrophysiological recordings from Gruntman et al. [6] for the 160 ms, 9° condition, at various positions in the receptive field of T5 (data dashed line, fit solid grey line). T5 average traces shown for bar position from “Leading” edge (-5, -3, -1) and “Trailing” edge (+1, +3, +5). **Middle:** Average Tm1 and Tm9 responses to 160 ms flashes are fit via linear regression to each T5 recording from Gruntman et al. [6] for the 160 ms, 9° condition (data dashed line, fit solid dark green line) **Bottom:** Same as *Middle* using Tm1 and Tm9 160 ms flashes in the presence of OA (data dashed line, fit solid line) Linear regression using flash responses and flash responses recorded in OA provides a good fit to T5 data. This is especially evident in the trailing edge (bar positions +3 and +5). **B.** Aggregate  $r^2$  values (square of sample correlation coefficient, see Methods) across bar positions for linear regression fits of Tm1+Tm9 to Gruntman et al. [8] recordings of T5 (conditions: 40 and 160 ms presentations of 2.25°, 4.5°, and 9° bars). Error bars depict standard deviation **C.** Distribution of  $r^2$  values across bar positions for fits to individual T5 responses to 160 ms, 9° bars. **D.** Example traces of fits to two single cells from C (T5 data, black dashed line; fits using saline flashes, dark green; fits using OA flashes, light green). **E.** Using the highly biphasic Tm1/Tm9 flashes recorded in OA improves the  $r^2$  of fits on the trailing edge of the T5 receptive field, where asymmetric hyperpolarization is most evident.

272 We next asked if our flash responses, which were obtained from an experimental paradigm  
273 more similar to the single-position bar flashes of Gruntman *et al.*, could predict the full  
274 response properties of T5 more accurately than our white noise filters. Using linear regression  
275 with positivity constraints, we found that a weighted sum of Tm1 and Tm9 responses derived  
276 from flash stimuli do better at reproducing measured T5 responses to single-position bar  
277 flashes (Figure 6A, *middle*), but still fall short of capturing both the extent and the kinetics  
278 of T5's asymmetric hyperpolarization at the trailing edge of the T5 receptive field. Since  
279 Tm1 flash responses obtained in OA conditions have faster kinetics and larger second lobes,  
280 we also ran the linear regression using flash responses of Tm1 and Tm9 obtained in the  
281 presence of OA, despite the apparent mismatch in recording conditions. In this case, the  
282 linear regression provides a near perfect fit with T5 data (Figure 6A, *bottom*).

283 It was puzzling that the flash responses recorded in OA provided such a good fit in the  
284 linear regression, as Gruntman *et al.* [8] acquired these data in regular saline and not in OA-  
285 supplemented saline. It is, however, conceivable that endogenous state modulation occurred  
286 during T5 recordings. This was hinted at by the apparent variability in the amplitude and  
287 kinetics of the asymmetric hyperpolarization in T5 responses across different cells [8]. To  
288 investigate this, we performed linear regression on individual T5 cells, instead of the average  
289 of all recordings, using flash responses recorded in either saline or saline with OA. For a  
290 subset of T5 cells, which displayed a slower and less salient hyperpolarization, the saline  
291 linear regression provided a good fit (Figure 6C and D *top*). For a different set of T5 cells,  
292 the OA linear regression provided a better fit (Figure 6D *bottom*). This indicates that the  
293 diversity of responses in the T5 data largely accounts for the distribution of our  $r^2$  values  
294 (Figure 6C). In these cases, performing the linear regression using the OA flash responses  
295 often increased the  $r^2$  value substantially (Figure 6E). Although we performed this analysis  
296 using Tm1 and Tm9 to predict 9° 160 ms T5 flashes, these results stand across flash durations  
297 and widths (Figure S7A) as well as using other combinations of Tm inputs (Figure S7B).

298 In all conditions, the coefficients output by this linear regression show distinct separation  
299 between Tm1 and Tm9 (Figure S7C), similar to that seen in the electron-microscopy (EM)  
300 data. In addition, the weighted spatiotemporal receptive fields constructed by linearly com-  
301 bining Tm1 and Tm9 fits are tilted in space-time, indicating direction selectivity. The tilt  
302 in space-time is more prominent when these are constructed from flash responses, both in  
303 saline and OA, demonstrating the increased effectiveness of flash responses at capturing T5  
304 direction selectivity. In agreement with this, the same linear regression fits predict the pro-  
305 file of T5 responses to moving bars from Gruntman *et al.* [8], as well as direction selectivity  
306 (Figure S7D, see Methods).

307 These results demonstrate that including a biphasic input to T5 can account for its  
308 spatially asymmetric hyperpolarization. This shows that stimulus- and state-dependent  
309 properties of inputs strongly affect output at the T5 level. Thus, for a model to accurately  
310 describe the direction selective responses of T5 to moving stimuli, it must consider both  
311 stimulus- and state-dependent processing properties of its inputs.

312 **A connectome-based model captures OFF pathway direction selectivity in the**  
313 **context of different stimuli and states**

314 Motivated by the linear regression, we built a model of T5 direction selectivity that is  
315 faithful to the anatomy of the circuit and takes into account our experimental measurements  
316 of Tm response properties. We imposed the following overarching constraints: (1) T5 receives  
317 inputs from Tm9 in one ommatidial column, and Tm1, Tm2, and Tm4 from an adjacent  
318 column, (2) all four T5 inputs are excitatory (cholinergic), and (3) the response properties of  
319 the transmedullar inputs vary with stimulus or state, as we demonstrated. We captured the  
320 first constraint by separating the center of the receptive field of Tm9 by  $5^\circ$  from the rest of  
321 the Tm cells (Figure 7A). The second constraint was satisfied by requiring all cells to provide  
322 positive input to T5. Additionally, we used the relative synaptic counts of Tm1, Tm2, Tm4  
323 and Tm9 from the connectome as synaptic weights to constrain the relative contribution  
324 of each cell type to T5 responses [18]. As for the third constraint, when constructing the  
325 four inputs to T5, we matched their response properties with the stimulus presented to our  
326 model, such as moving sine waves [20, 8] or high contrast moving bars [8].

327 We first modeled T5 responses to sine waves. To describe the response of each T5 input  
328 to this stimulus, we used the temporal and spatial filters of Tm1, Tm2, Tm4, and Tm9  
329 extracted from white noise analysis, as well as their associated static nonlinearities (see  
330 Methods). These filters accurately predicted measured responses of Tm cells to sine waves  
331 (Figure S8), making them appropriate descriptors of cellular responses in this particular  
332 stimulus regime. Output from this model in response to sine waves matched T5 data from  
333 previous studies, in that it predicted maximum preferred direction (PD) tuning just below 1  
334 Hz (Figure 7B) [21, 4]. The direction selectivity index (DSI) for the output of the model also  
335 fell within the range of experimentally calculated DSIs from two recent studies: Wienecke  
336 et al. [20], using voltage-imaging, and Gruntman et al. [8], using electrophysiology (Figure  
337 7C). We then asked how the enhanced biphasic character and shifted frequency tuning of  
338 filters extracted in the presence of OA affected model output. In this case, our model  
339 predicted a broadening and a shift in T5 PD frequency tuning toward faster frequencies  
340 (Figure 7B) that matched previous measurements of T5 [4] and LPTC [22] tuning in the  
341 presence of OA or the OA agonist chlordimeform (CDM). Furthermore, using OA-derived  
342 filters increased DSI (Figure 7C). These results using white noise filters show that combining  
343 Tm1, Tm2, Tm4 and Tm9 responses linearly with EM connectome weights is sufficient to  
344 achieve the direction selective response of T5 cells to sine waves across studies.

345 We next modeled T5 response to moving high contrast bars. The results of our linear  
346 regression analysis showed that strongly biphasic Tm responses best predicted T5 flashing  
347 bar responses. As expected, the characteristic white noise filters for Tm1, Tm2, Tm4 and  
348 Tm9 did not capture the DSI of T5 responses to moving bars (Figure 7D *left*, E). We therefore  
349 constructed a corollary model of T5 based on parameterized flash responses for Tm1, Tm2,  
350 Tm4 and Tm9 (see Methods). The increased biphasic nature of the flash responses allowed  
351 the model to achieve direction selectivity for moving bar stimuli in the range of T5 recorded  
352 electrophysiology data [8] (Figure 7 D *middle*, E). In this case, the negative lobe from strongly  
353 biphasic Tm inputs cancels out depolarizations in lieu of direct inhibition. Correspondingly,  
354 flash responses obtained in the presence of OA, which are more biphasic than those obtained  
355 in saline alone, increased the model's DSI when used as inputs (Figure 7 E *right* and F).

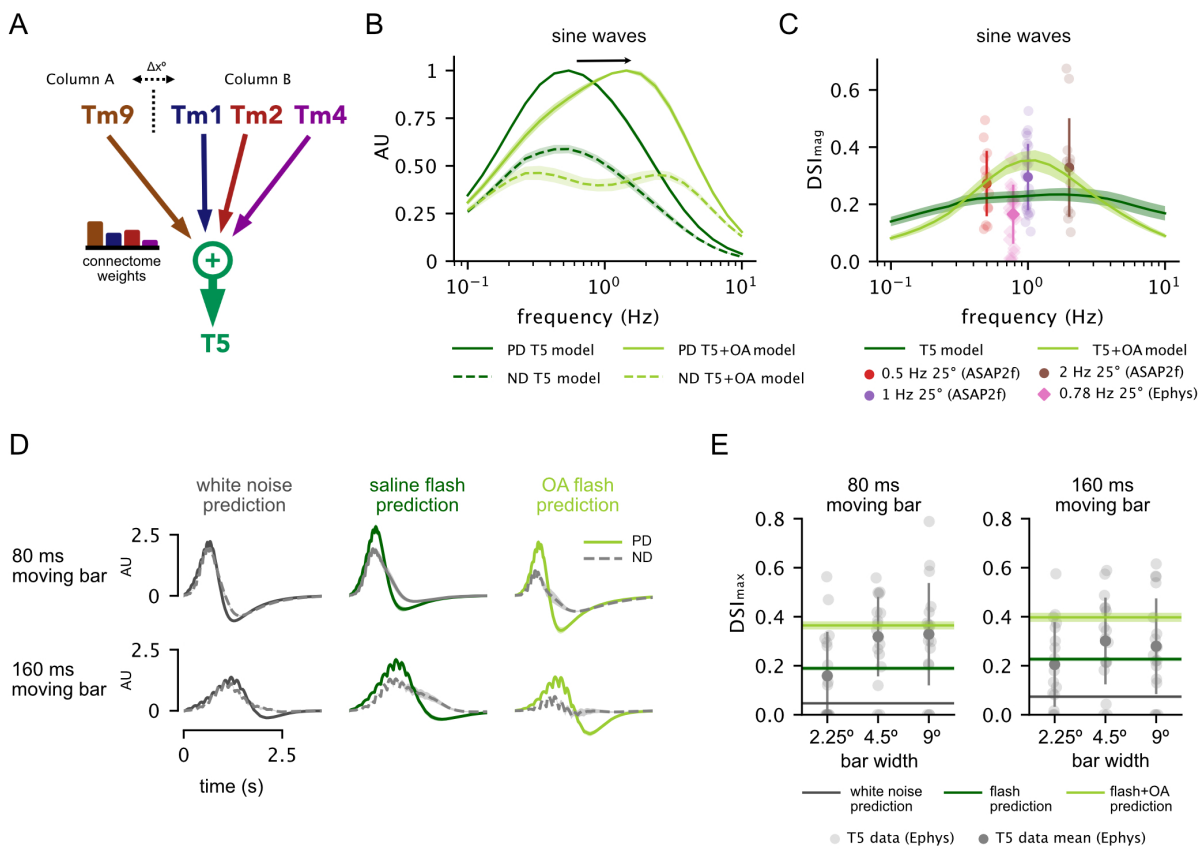

**Figure 7: Low-Parameter, Connectome Based Model is Sufficient to Capture OFF Pathway Direction Selectivity in the context of different stimuli and states** **A**. Schematic of model framework constructed with Tm9 spatially offset from Tm1, Tm2 and Tm4 by  $\Delta x = 5^\circ$ . **B**. Preferred direction (PD) and null direction (ND) frequency tuning of model to sine waves using parameterized spatiotemporal filters extracted in saline alone vs. those extracted in the presence of OA. **C**. Direction selectivity index ( $DSI_{mag} = (|PD| - |ND|) / (|PD| + |ND|)$ , see Methods) for model using saline-derived filters with  $n=20$  samples of published EM weights from [16] across various frequencies (dark green) compared to output using OA-derived filters (dark green). Experimental voltage-imaging (ASAP2f) T5 DSI data shown from Wienecke et al. [20] (circles), and T5 electrophysiology data from Gruntman et al. [8] (diamonds). **D**. Example PD and ND model output traces for an 80 ms and a 160 ms moving bar stimulus, with inputs based on white noise predictions (*left*, black), flash responses recorded in saline (*middle*, dark green) and OA (*right*, light green). **E**. Using flash response-based inputs, model DSI falls within the range of T5 electrophysiology data reported by Gruntman et al. [8] for moving bars. Direction selectivity index ( $DSI_{max} = (\max(PD) - \max(ND)) / (\max(PD) + \max(ND))$ , see Methods) increases when using OA-based flash responses due to their biphasic nature.

356 These results demonstrate that the increased biphasic character of Tm cells, which occurs  
 357 both as the result of changes to stimulus or the presence of a neuromodulator, can produce  
 358 direction selectivity on par with that seen in T5 electrophysiology recordings.

359 Previous studies were unable to reconcile direction selectivity in T5 with the constraint  
 360 of solely excitatory columnar inputs due to underdescribed processing properties of Tm cell  
 361 inputs to T5, leading them to invoke an illusive source of direct inhibition. Our state- and  
 362 stimulus-dependent measurements and modeling therefore reconcile anatomy and function

363 in a canonical *Drosophila* motion circuit.

## 364 Discussion

365 In this study, we demonstrated that the response properties of neurons in the *Drosophila*  
366 OFF motion pathway are shaped by both visual stimulus statistics and a behaviorally rel-  
367 evant neuromodulator, and that such flexibility clarifies the computation of direction selec-  
368 tivity. We found that Tm white noise-extracted filters can be poor predictors of Tm cell  
369 responses to stimuli with different visual statistics. Specifically, these filters fail to capture  
370 changes in the shape of the responses to high contrast flashes. We also demonstrated that  
371 similar changes to the filtering properties of T5's columnar inputs arise due to the action of  
372 the neuromodulator octopamine. Incorporating these state- and stimulus-dependent proper-  
373 ties into an anatomically constrained model of the motion circuit based on input summation  
374 yields a good prediction of T5 responses across stimulus regimes. Our results demonstrate  
375 that neurons in the *Drosophila* visual system operate within a stimulus- and state-dependent  
376 space of temporal filtering parameters, and are underdescribed by the filters commonly used  
377 in *Drosophila* motion circuit models.

## 378 Stimulus- and state-dependent changes in filtering properties highlight circuit 379 flexibility

380 Flexible processing of stimuli is a ubiquitous feature of sensory systems across species [1, 2,  
381 3]. In blowflies, the temporal properties of lamina monopolar cells (LMCs), the main inputs  
382 to the transmedullary cells that we focused on in this study, display stimulus-dependent  
383 changes in shape. Both van Hateren [31] and Srinivasan et al. [32] have shown that LMC  
384 responses are more biphasic with increasing signal to noise ratio (SNR) of the stimulus.  
385 These studies provide a rationale for differences across conditions. A monophasic, or low-  
386 pass, filter acts as an integrator, extracting slow temporal components of a visual scene. This  
387 is useful when visual information is noisy (low SNR), because increases in the redundancy of  
388 information translate into increases in reliability. A biphasic, or band-pass, filter, however,  
389 is advantageous in high SNR conditions because it acts as a differentiator and efficiently  
390 conveys changes in the stimulus, thereby decreasing correlations and reducing redundancy  
391 [33].

392 When comparing responses across stimuli in different SNR regimes, our recordings of  
393 Tm1, Tm2 and Tm4 are compatible with these hypotheses. The temporal filters of these  
394 three neurons have less biphasic shapes in response to temporally unstructured stimuli that  
395 have the characteristics of noise, both white and ternary, which we consider to correspond  
396 to a low SNR regime. Responses to low contrast flashes, which can also be considered low  
397 SNR, are also close to monophasic and are well predicted by white noise filters. On the other  
398 hand, high contrast (high SNR) flashes produce strong biphasic responses. The properties  
399 of Tm1, Tm2 and Tm4 are therefore similar to and likely inherited from their LMC input  
400 (primarily L2, Figure 1A).

401 Interestingly, we find that the addition of OA produces a more biphasic character in  
402 the white noise-extracted temporal filtering properties of Tm1, Tm2, and Tm4, similar  
403 to the waveform changes seen in response to high contrast flashes. Following the logic



404 discussed above, this change in filter shape would optimize information processing in high  
405 SNR regimes. More biphasic, differentiator-like responses may be beneficial for the rapidly  
406 changing visual scene when a fly is walking or flying. This raises the possibility that OA, by  
407 shifting processing properties towards those induced by high SNR stimuli, acts to prime T5  
408 inputs to detect salient stimuli in the natural statistics of a moving or flying fly. Furthermore,  
409 columnar inputs to T5 express receptors for many neuromodulators other than OA [34],  
410 suggesting that state-dependent modulation of motion detection likely plays an even more  
411 heterogeneous role, with multiple neuromodulators acting in concert at any given time.

412 In addition to changes in filter shapes, we observed OA-dependent shifts in the kinetics  
413 of the temporal filters of Tm1, Tm2 and Tm4 towards faster speeds. Locomotion, through  
414 the release of OA, has previously been shown to broaden and shift the tuning of *Drosophila*  
415 motion detector outputs toward higher frequencies [21, 22]. This mechanism is thought to  
416 tune motion pathways to the increased frequencies of motion that flies experience as a result  
417 of self-motion during locomotion. This effect is thought to be, at least in part, through the  
418 modulation of T4/T5 inputs [4]. Our findings corroborate the hypothesis that octopaminergic  
419 modulation of frequency tuning in this circuit is inherited in part from upstream elements.  
420 In addition, our high temporal resolution data shows that Tm1, Tm2 and Tm4 have similar  
421 temporal response dynamics in saline, but acquire different kinetics in the presence of OA.  
422 This broadens the range of temporal frequencies collectively encoded by these three neurons  
423 (Figure 5A), an effect that we see in the output of our model. Thus, while Tm1, Tm2 and  
424 Tm4 might appear to have redundant roles, the differential effect of OA on these three T5  
425 inputs highlights a functional relevance in the context of changing behavioral states. Finally,  
426 in contrast to Tm1, Tm2, and Tm4, we find the temporal filtering properties of Tm9 to be  
427 less affected by either stimulus statistics or by the presence of OA.

428 We focused here on changes in temporal dynamics; however, it is likely that additional  
429 processing properties of Tm neurons, such as in their spatial receptive fields, are sensitive  
430 to both stimulus and state. Integrating changes in these processing properties could hypo-  
431 thetically fine-tune the motion-selective outputs across conditions. In addition, we find two  
432 distinct classes of Tm9 cells with different sizes of receptive field, as has been previously re-  
433 ported [26]. Although larger spatial receptive fields may not contribute directly to direction  
434 selectivity, further characterization of this heterogeneity may provide insight into diverse T5  
435 responses.

## 436 **Accounting for stimulus dependence clarifies circuit mechanisms**

437 Although direction selectivity has been investigated since the 1950s, the mechanisms  
438 underlying motion detection in the invertebrate visual lobe and their cellular implementation  
439 are still being debated [35, 36]. For the OFF pathway that we have explored, one debate  
440 concerns the linearity of the summation of inputs to directionally selective T5 neurons.  
441 Wienecke et al. [20] argue that the response of T5 axonal terminals to stationary and moving  
442 sine waves suggests linear summation, whereas Gruntman et al. [8], who studied responses to  
443 flashed and moving bars, argue for nonlinear summation. Neither of the studies had access  
444 to the waveform of the actual inputs to T5 - the results we have presented. On the basis  
445 of this additional knowledge, our modeling work supports linear summation. In addition,  
446 although T5 responses show apparent suppression in some regions of the visual field, we find

447 that this does not require an inhibitory input. Instead, the biphasic character of the Tm1,  
448 Tm2, and Tm4 responses can reproduce the data without direct inhibition. Furthermore,  
449 we found that the model could account for direction selectivity when not only the identity  
450 but also the strengths of its connections were determined directly from the connectome data  
451 [18].

452 It should be stressed that we are not proposing that inhibition plays no role in the  
453 directionally selective OFF pathway. For example, the wide-field inhibitory cell CT1 [37,  
454 18] may provide wide-field gain normalization [38, 6]. Such normalization could enhance  
455 direction selectivity, but we argue that it is not necessary for producing it.

## 456 **Stimulus and state dependence in sensory processing of natural scenes**

457 It is well established that white noise filter characterizations of cells in the mammalian  
458 retina and V1 are poor predictors of responses to natural scenes [39]. We expect that Tm  
459 white noise filters will similarly fail to capture Tm responses to natural scenes. However, it  
460 is likely that responses to natural scenes will occupy the “parameter space” defined by the  
461 diverse responses probed here and elsewhere [27, 35, 4, 6, 5]. Many approaches have been  
462 proposed for characterizing cell responses to natural stimuli in an interpretable manner [40,  
463 39, 41]. Correctly incorporating the link between scene statistics, the location in parameter  
464 space, and the appropriate Tm filtering properties will be essential in accounting for direction  
465 selectivity in a natural setting.

## 466 **Acknowledgments**

467 We thank A.J. Zimnik and S.L. Heath for comments on the manuscript. We thank  
468 C.F.R. Wienecke and T.R. Clandinin for sharing T5 sine wave data. J.R.K. acknowledges  
469 support from the James H. Gilliam Fellowships for Advanced Study program (HHMI) and  
470 NIH F31EY030319. J.P.P. was supported by Neuronex NSF 1707398. M.P.C. was supported  
471 from NIH 5T32EY013933 and NIH R01EY029311. L.F.A. was supported by NSF NeuroNex  
472 Award 1707398, the Gatsby Charitable Foundation GAT3708 and the Simons Collaboration  
473 for the Global Brain. R.B. was supported by NIH R01EY029311, the McKnight Foundation,  
474 the Grossman Charitable Trust, the Pew Charitable Trusts, and the Kavli Foundation.

## 475 References

- 476 [1] M. Rivlin-Etzion, W. N. Grimes, F. Rieke, Flexible neural hardware supports dynamic  
477 computations in retina, *Trends in neurosciences* 41 (2018) 224–237.
- 478 [2] W. F. Młynarski, A. M. Hermundstad, Adaptive coding for dynamic sensory inference,  
479 *Elife* 7 (2018) e32055.
- 480 [3] A. I. Weber, K. Krishnamurthy, A. L. Fairhall, Coding principles in adaptation, *Annual*  
481 *review of vision science* 5 (2019) 427–449.
- 482 [4] A. Arenz, M. S. Drews, F. G. Richter, G. Ammer, A. Borst, The temporal tuning of  
483 the *Drosophila* motion detectors is determined by the dynamics of their input elements,  
484 *Current Biology* 27 (2017) 929–944.
- 485 [5] C. A. Matulis, J. Chen, A. D. Gonzalez-Suarez, R. Behnia, D. A. Clark, Heterogeneous  
486 temporal contrast adaptation in *Drosophila* direction-selective circuits, *Current Biology*  
487 30 (2020) 222–236.
- 488 [6] M. S. Drews, A. Leonhardt, N. Pirogova, F. G. Richter, A. Schuetzenberger, L. Braun,  
489 E. Serbe, A. Borst, Dynamic signal compression for robust motion vision in flies, *Current*  
490 *Biology* 30 (2020) 209–221.
- 491 [7] E. Gruntman, S. Romani, M. B. Reiser, Simple integration of fast excitation and offset,  
492 delayed inhibition computes directional selectivity in *Drosophila*, *Nature neuroscience*  
493 21 (2018) 250–257.
- 494 [8] E. Gruntman, S. Romani, M. B. Reiser, The computation of directional selectivity in  
495 the *Drosophila* off motion pathway, *Elife* 8 (2019) e50706.
- 496 [9] J. A. Zavatore-Veth, B. A. Badwan, D. A. Clark, A minimal synaptic model for direction  
497 selective neurons in *Drosophila*, *Journal of Vision* 20 (2020) 2–2.
- 498 [10] J. A. Strother, S.-T. Wu, A. M. Wong, A. Nern, E. M. Rogers, J. Q. Le, G. M. Rubin,  
499 M. B. Reiser, The emergence of directional selectivity in the visual motion pathway of  
500 *Drosophila*, *Neuron* 94 (2017) 168–182.
- 501 [11] B. Schnell, S. V. Raghu, A. Nern, A. Borst, Columnar cells necessary for motion  
502 responses of wide-field visual interneurons in *Drosophila*, *Journal of Comparative Phys-*  
503 *iology A* 198 (2012) 389–395.
- 504 [12] M. S. Creamer, O. Mano, D. A. Clark, Visual control of walking speed in *Drosophila*,  
505 *Neuron* 100 (2018) 1460–1473.
- 506 [13] N. C. Klapoetke, A. Nern, M. Y. Peek, E. M. Rogers, P. Breads, G. M. Rubin, M. B.  
507 Reiser, G. M. Card, Ultra-selective looming detection from radial motion opponency,  
508 *Nature* 551 (2017) 237–241.

- 509 [14] M. S. Maisak, J. Haag, G. Ammer, E. Serbe, M. Meier, A. Leonhardt, T. Schilling,  
510 A. Bahl, G. M. Rubin, A. Nern, et al., A directional tuning map of *Drosophila* elemen-  
511 tary motion detectors, *Nature* 500 (2013) 212–216.
- 512 [15] J. C. S. Leong, J. J. Esch, B. Poole, S. Ganguli, T. R. Clandinin, Direction selectivity  
513 in *Drosophila* emerges from preferred-direction enhancement and null-direction suppres-  
514 sion, *Journal of Neuroscience* 36 (2016) 8078–8092.
- 515 [16] M. Meier, E. Serbe, M. S. Maisak, J. Haag, B. J. Dickson, A. Borst, Neural circuit  
516 components of the *Drosophila* off motion vision pathway, *Current Biology* 24 (2014)  
517 385–392.
- 518 [17] E. Serbe, M. Meier, A. Leonhardt, A. Borst, Comprehensive characterization of the  
519 major presynaptic elements to the *Drosophila* off motion detector, *Neuron* 89 (2016)  
520 829–841.
- 521 [18] K. Shinomiya, G. Huang, Z. Lu, T. Parag, C. S. Xu, R. Aniceto, N. Ansari,  
522 N. Cheatham, S. Lauchie, E. Neace, et al., Comparisons between the on-and off-edge  
523 motion pathways in the *Drosophila* brain, *Elife* 8 (2019) e40025.
- 524 [19] K. Shinomiya, T. Karuppudurai, T.-Y. Lin, Z. Lu, C.-H. Lee, I. A. Meinertzhagen, Can-  
525 didate neural substrates for off-edge motion detection in *Drosophila*, *Current Biology*  
526 24 (2014) 1062–1070.
- 527 [20] C. F. Wienecke, J. C. Leong, T. R. Clandinin, Linear summation underlies direction  
528 selectivity in *Drosophila*, *Neuron* 99 (2018) 680–688.
- 529 [21] M. E. Chiappe, J. D. Seelig, M. B. Reiser, V. Jayaraman, Walking modulates speed  
530 sensitivity in *Drosophila* motion vision, *Current Biology* 20 (2010) 1470–1475.
- 531 [22] M. P. Suver, A. Mamiya, M. H. Dickinson, Octopamine neurons mediate flight-induced  
532 modulation of visual processing in *Drosophila*, *Current Biology* 22 (2012) 2294–2302.
- 533 [23] E. Chichilnisky, A simple white noise analysis of neuronal light responses, *Network:  
534 Computation in Neural Systems* 12 (2001) 199–213.
- 535 [24] R. Behnia, D. A. Clark, A. G. Carter, T. R. Clandinin, C. Desplan, Processing properties  
536 of on and off pathways for *Drosophila* motion detection, *Nature* 512 (2014) 427–430.
- 537 [25] S. A. Baccus, M. Meister, Fast and slow contrast adaptation in retinal circuitry, *Neuron*  
538 36 (2002) 909–919.
- 539 [26] Y. E. Fisher, J. C. Leong, K. Sporar, M. D. Ketkar, D. M. Gohl, T. R. Clandinin,  
540 M. Silies, A class of visual neurons with wide-field properties is required for local  
541 motion detection, *Current Biology* 25 (2015) 3178–3189.
- 542 [27] H. H. Yang, F. St-Pierre, X. Sun, X. Ding, M. Z. Lin, T. R. Clandinin, Subcellular  
543 imaging of voltage and calcium signals reveals neural processing in vivo, *Cell* 166 (2016)  
544 245–257.

- 545 [28] E. Marder, Neuromodulation of neuronal circuits: back to the future, *Neuron* 76 (2012)  
546 1–11.
- 547 [29] C. I. Bargmann, Beyond the connectome: how neuromodulators shape neural circuits,  
548 *Bioessays* 34 (2012) 458–465.
- 549 [30] K. Y. Cheng, M. A. Frye, Neuromodulation of insect motion vision, *Journal of Com-*  
550 *parative Physiology A* (2019) 1–13.
- 551 [31] J. H. van Hateren, Theoretical predictions of spatiotemporal receptive fields of fly lmc8,  
552 and experimental validation, *Journal of Comparative Physiology A* 171 (1992) 157–170.
- 553 [32] M. V. Srinivasan, S. B. Laughlin, A. Dubs, Predictive coding: a fresh view of inhibition  
554 in the retina, *Proceedings of the Royal Society of London. Series B. Biological Sciences*  
555 216 (1982) 427–459.
- 556 [33] L. Zhaoping, Z. Li, *Understanding vision: theory, models, and data*, Oxford University  
557 Press, USA, 2014.
- 558 [34] F. P. Davis, A. Nern, S. Picard, M. B. Reiser, G. M. Rubin, S. R. Eddy, G. L. Henry,  
559 A genetic, genomic, and computational resource for exploring neural circuit function,  
560 *Elife* 9 (2020) e50901.
- 561 [35] H. H. Yang, T. R. Clandinin, Elementary motion detection in *Drosophila*: algorithms  
562 and mechanisms, *Annual Review of Vision Science* 4 (2018) 143–163.
- 563 [36] A. Borst, M. Drews, M. Meier, The neural network behind the eyes of a fly, *Current*  
564 *Opinion in Physiology* (2020).
- 565 [37] M. Meier, A. Borst, Extreme compartmentalization in a *Drosophila* amacrine cell,  
566 *Current Biology* 29 (2019) 1545–1550.
- 567 [38] B. A. Badwan, M. S. Creamer, J. A. Zavatone-Veth, D. A. Clark, Dynamic nonlin-  
568 earities enable direction opponency in *Drosophila* elementary motion detectors, *Nature*  
569 *neuroscience* 22 (2019) 1318.
- 570 [39] N. Maheswaranathan, L. McIntosh, D. B. Kastner, J. Melander, L. Brezovec, A. Nayebi,  
571 J. Wang, S. Ganguli, S. A. Baccus, Deep learning models reveal internal structure and  
572 diverse computations in the retina under natural scenes, *BioRxiv* (2018) 340943.
- 573 [40] A. Calabrese, J. W. Schumacher, D. M. Schneider, L. Paninski, S. M. Woolley, A  
574 generalized linear model for estimating spectrotemporal receptive fields from responses  
575 to natural sounds, *PloS one* 6 (2011) e16104.
- 576 [41] Y. J. Kim, N. Brackbill, E. Batty, J. Lee, C. Mitelut, W. Tong, E. Chichilnisky, L. Panin-  
577 ski, Nonlinear decoding of natural images from large-scale primate retinal ganglion  
578 recordings, *bioRxiv* (2020).
- 579 [42] J. Zhuang, L. Ng, D. Williams, M. Valley, Y. Li, M. Garrett, J. Waters, An extended  
580 retinotopic map of mouse cortex, *Elife* 6 (2017) e18372.

- 581 [43] J. Peirce, J. R. Gray, S. Simpson, M. MacAskill, R. Höchenberger, H. Sogo, E. Kastman,  
582 J. K. Lindeløv, *Psychopy2: Experiments in behavior made easy*, *Behavior research*  
583 *methods* 51 (2019) 195–203.
- 584 [44] R. R. Hocking, *Methods and applications of linear models: regression and the analysis*  
585 *of variance*, John Wiley & Sons, 2013.
- 586 [45] D. Stavenga, *Angular and spectral sensitivity of fly photoreceptors. ii. dependence*  
587 *on facet lens f-number and rhabdomere type in *Drosophila**, *Journal of Comparative*  
588 *Physiology A* 189 (2003) 189–202.
- 589 [46] M. Mazurek, M. Kager, S. D. Van Hooser, *Robust quantification of orientation selec-*  
590 *tivity and direction selectivity*, *Frontiers in neural circuits* 8 (2014) 92.

## 591 **Methods**

### 592 *Electrophysiology Preparation*

593 In order to target specific medulla cell populations, we used the Gal4-UAS binary ex-  
594 pression system in a w+ background to drive expression of a cytosolic variant of GFP in  
595 each individual fly line. Gal4 lines were as follows: R71G04-Gal4 (Tm1), otd-Gal4 (Tm2),  
596 R35H01 (Tm4), and R24C08-Gal4 (Tm9). Live flies were immobilized in a position that  
597 allowed them to see visual stimuli while providing physical access to one optic lobe, and  
598 electrophysiological recordings were performed as in Behnia et al. [24].

### 599 *Stimulus Presentation*

600 We built visual stimuli using our own custom extension of the Allen Brain Institute's  
601 retinotopic-mapping package [42]. Each stimulus was warped and projected onto a flat  
602 screen aligned with the left eye. To correctly warp the stimulus, we assumed the eye was a  
603 sphere and measured the size of the screen, distance of the eye to the screen, the angle of  
604 the eye center relative to the plane that the screen lay in, and the position of the eye within  
605 the screen. Using this information, we were able to map pixels to their corresponding visual  
606 degrees. We added an indicator that was synced to the presentation of each stimulus and  
607 detected via a photodiode in order to sync our stimulus to our electrophysiological recordings.  
608 For stimulus presentation, we used the PsychoPy package [43]. Stimuli were displayed using  
609 a Texas Instrument Lightcrafter PRO4500 in monochrome mode (green) running at 180Hz.  
610 The mean luminance of the projector was  $1.39 W/m^2$ , while the max luminance was  $4.37$   
611  $W/m^2$ .

- 612 • White noise stimulus: (Figure 2, Figure 4) our white noise stimulus consisted of  $5^\circ$   
613 horizontal bars flickering at 60 Hz with luminance values randomly drawn from a trun-  
614 cated Gaussian distribution. The stimulus was therefore changing across one spatial  
615 dimension and one time dimension, allowing for the extraction of two-dimensional  
616 spatiotemporal filters via white noise reverse correlation.
- 617 • Full field flashes: (Figure 3, Figure 4 Figure S5) OFF flashes of 20 ms, 40 ms, 80  
618 ms and 160 ms with 10 second intervals were repeated for four sweeps per recording.  
619 High contrast OFF flashes consisted of light decrements from the mean luminance of  
620 the projector to its minimum output, corresponding to a Weber contrast of -1 (Figure  
621 3A, Figure 4E), while low contrast OFF flashes consisted of light decrements from the  
622 mean luminance of the projector corresponding to a Weber contrast of -0.1.
- 623 • Ternary noise: (Figure S4) The ternary noise stimulus consisted of  $5^\circ$  horizontal bars  
624 flickering at 60Hz with luminance values randomly sampled from Weber contrast steps  
625 of -1, 0, or 1 (high contrast condition) from the mean luminance of the projector, or  
626 -0.1, 0, or 0.1 (low contrast condition) from the mean luminance of the projector.
- 627 • Drifting gratings: (Figure S8) Drifting grating stimulus consisted of 0.5 Hz, high con-  
628 trast drifting square waves of spatial wavelengths ranging from  $2.5^\circ$ ,  $10^\circ$ ,  $12.5^\circ$ ,  $25^\circ$ ,  
629  $40^\circ$ ,  $50^\circ$ ,  $80^\circ$ ,  $100^\circ$ ,  $125^\circ$ , and  $200^\circ$ .

### 630 *Reverse correlation for extraction of white noise filters*

631 We extracted spatiotemporal white noise filters and static nonlinearities via the reverse  
632 correlation method as described in Behnia et al. [24] and elsewhere [23, 40, 4, 5]. All “white-  
633 noise filter” predictions in this study are linear-nonlinear (LN) predictions, as cell response  
634 predictions combine white noise (linear) filters with static nonlinearities.

635 To extract white noise filters for each cell, we selected continuous responses to white  
636 noise over a window of time ranging from 30-120 seconds depending on recording stability.  
637 Traces were downsampled to 100 Hz, and filters were extracted for a duration of 5 seconds.  
638 Spatiotemporal filter properties were not significantly affected by different downsampling  
639 factors, or by increasing or decreasing filter duration.

640 All spatiotemporal filters were space-time separable: thus, after a 2D spatiotemporal  
641 filter was extracted via reverse correlation, we extracted a characteristic 1D temporal filter  
642 by selecting the temporal trace at the spatial location with the highest amplitude. These 1D  
643 temporal filters were averaged across individual recordings to get a characteristic temporal  
644 filter for each cell type (Figure 2A, 4A). In order to characterize each temporal filter in  
645 frequency space, we convolved each 1D temporal filter with 1D sine waves of varying temporal  
646 frequencies from 0.1 to 10 Hz. The maximum steady-state amplitude of the convolved  
647 response at each frequency constituted a frequency tuning curve. These tuning curves were  
648 normalized and averaged across individual recordings to get a characteristic frequency tuning  
649 curve for each cell type (Figure 2B, 4B).

650 We extracted a characteristic 1D spatial receptive field by selecting the spatial profile at  
651 the time point with the highest amplitude. These 1D spatial receptive fields were averaged  
652 across individual recordings to get a characteristic spatial filter for each cell type (Figure  
653 2C, 4C). As the white noise stimulus consisted of 5° horizontal bars, these spatial receptive  
654 fields have a resolution of 5°.

655 In order to obtain static nonlinearities, 2D white noise filters were convolved in time and  
656 summed in space to obtain (1D) linear predictions in time that could be compared with the  
657 (1D) recorded responses. The predicted and actual responses were binned by amplitude and  
658 averaged within each bin across recordings (Figure 2D, 4D). Bin size did not significantly  
659 affect static nonlinearity shape.

660 In order to compare flash responses to predictions based on extracted white noise filters,  
661 each spatiotemporal white noise filter was convolved in time with a 2D flash stimulus of the  
662 appropriate duration and summed across space. The resulting 1D linear prediction in time  
663 was then transformed via the static nonlinearity, resulting in a LN prediction. These LN  
664 predictions were then averaged (Figure 3A, S5A). The same approach was used to compare  
665 drifting grating data with white noise filter predictions (Figure S8).

## 666 **Parameter Fitting**

667 We parameterized both extracted white noise filters and flash responses in order to com-  
668 pare Tm cell changes across conditions.

### 669 *Parameterization of White Noise Filters*

670 Spatial receptive fields in all scenarios were fit to a Gaussian function  $g(x) = e^{-(x-\mu)^2/2\sigma^2}$ .  
671 The mean temporal filters for Tm1, Tm2, Tm4 and Tm9 were similarly fit with a biphasic



672 function in time  $t$ :

$$f(t) = \frac{1}{\tau_2} t \cdot e^{-t/\tau_1} - c \cdot \frac{1}{\tau_1} t \cdot e^{-t/\tau_2} \quad (1)$$

673 The two lobes of the biphasic function are determined by constants  $\tau_1$  and  $\tau_2$ . For  
674 parameterizing temporal filters from our white noise analysis, we set  $c = 1$ . This constrained  
675 the convolution of the above function with a constant stimulus to integrate to zero, thus  
676 fitting the band-pass character of recorded cells (see Figure S2A,B). These parameterizations  
677 did not adversely affect the tuning properties of the filters for each cell type (Figure S6). For  
678 parameterized flash responses,  $c$  was unconstrained. All functions were parameterized using  
679 `scipy.optimize.curve_fit`.

680 We derived frequency tuning curves for parameterized white noise filters by convolving  
681 them with 1D sine waves of varying temporal frequencies varying from 0.1 to 10 Hz. The  
682 tuning curve consisted of the maximum amplitude of the steady state response at each  
683 frequency (Figure 5C). These frequency tuning curves were identical to tuning curves derived  
684 analytically via transfer functions (not shown). The full width half max (FWHM) and peak  
685 frequency was calculated numerically (Figure 5D). To compare flashes with white noise filters  
686 in the same parameter regime, we generated white noise filter LN predictions of 20 ms flashes  
687 (Figure 5A,B) and plotted them alongside parameterized 20 ms flash responses.

## 688 Linear Regression

689 In order to determine if our electrophysiological recordings of Tm1, Tm2, Tm4 and Tm9  
690 could match electrophysiological recordings of T5, we applied linear regression of Tm1 and  
691 Tm9 flash responses to recorded T5 responses from Gruntman et al. [8]. The authors of  
692 this paper recorded individual T5 cell responses to static vertical bar flashes of width 2.25°,  
693 4.5° and 9° at different spatial locations, and for a duration of 40 ms and 160 ms, for  
694 a total of six conditions. T5 Traces from Gruntman et al. [8] were accessed via [https://figshare.com/collections/Simple\\_integration\\_paper\\_data\\_and\\_code/3955843](https://figshare.com/collections/Simple_integration_paper_data_and_code/3955843).

695 We required coefficients to be strictly positive so as to maintain the sign of the input, and  
696 also did not fit an intercept under the assumption that all T5 recordings were preprocessed  
697 such that they had a baseline of zero. Regression was done using the `scikitlearn` LASSO  
698 module, which allows positive weight constraints, with  $\alpha = 0.0001$  ( $\alpha = 0$  equivalent to a  
699 simple linear regression). We first applied linear regression to the average T5 responses for  
700 each bar location and condition (Figure 6A-C, S7). We then applied linear regression to  
701 individual T5 traces for each T5 cell, for each bar location and condition (Figure 6D-F).

702 As input to the linear regression, we used: (1) Tm1 and Tm9 white noise LN predictions  
703 for 40 ms and 160 ms flashes, as well as (2) measured Tm1 and Tm9 response to 40 ms and  
704 160 ms flashes, and (3) measured Tm1 and Tm9 response to 40 ms and 160 ms flashes in  
705 the presence of OA (Figure 6A,B). None of these inputs were parameterized.

706 Since our linear regression did not use an intercept term, we used the square of the sample  
707 Pearson correlation coefficient  $r^2$  as our measure of goodness of fit, instead of the coefficient  
708 of determination  $R^2$  [44].  $r^2$  values were averaged across spatial locations for each condition  
709 and linear regression fit (Figure 6B).

711 Gruntman et al. [8] also recorded T5 responses to moving bars consisting of 20, 40,  
712 80 and 160 ms consecutive flashes, across 2.25°, 4.5° and 9° widths. In order to predict  
713 the T5 response to moving bars, we summed the weighted Tm1 and Tm9 flash responses  
714 with appropriate time delays for the preferred direction and (opposite) null direction. The  
715 regression coefficients fit to the static T5 data were used for each matching condition (e.g.  
716 the coefficients from the 160 ms, 9° static condition were used to predict the response to  
717 the 160 ms, 9° moving bar condition, etc.). Both the PD and ND summed traces were then  
718 scaled by a single “gain factor” obtained by a separate linear regression on the combined PD  
719 and ND traces (Figure S7D).

## 720 Model Construction

721 We built our framework for T5 based on established EM connectivity and an assumption  
722 of positivity for all Tm1, Tm2, Tm4 and Tm9 inputs onto T5. Specifically, Tm1, Tm2 and  
723 Tm4 were centered and Tm9 was offset by  $\Delta x = 5^\circ$  [45, 4]. The output of each of these cells  
724 was assigned a positive (cholinergic) connection weight proportional to EM synapse counts  
725 before being summed (Figure 7A, see below).

726 In order to construct a white noise model of T5 based on LN predictions for each cell type  
727 Tm1, Tm2, Tm4 and Tm9, 2D spatiotemporal receptive fields for each cell were constructed  
728 by taking the outer product of the parameterized gaussian spatial receptive field  $g(x)$  and  
729 the temporal filter  $f(t)$ :

$$D(x, t) = g(x) \otimes f(t) \quad (2)$$

730 A given 2D stimulus in space-time  $S(x, t)$  is convolved with each spatiotemporal receptive  
731 field in time (but not in space), and then summed over space to give a 1D time course for  
732 each cell Tm1, Tm2, Tm4, Tm9. In discrete time this is:

$$y[t] = \sum_x \sum_\tau D[x, \tau] S[x, t - \tau] \quad (3)$$

733 Finally, the mean of the static nonlinearities extracted via white noise analysis for each  
734 cell were parameterized by a softplus function:

$$h(y) = c \log(1 + e^{(ay+b)^k}) + d \quad (4)$$

735 where  $a$  determines the sharpness of the “bend,”  $b$  translates the softplus curve along  
736 the x-axis, the multiplicative factor  $c$  controls the angle/slope,  $d$  determines offset along the  
737 y-axis, and the exponent  $k$  increases the curvature. The LN output of each cell was then  
738 normalized based on the numerical frequency tuning curve (so that the maximum possible  
739 gain across all frequencies was 1). Finally, Tm1, Tm2, Tm4 and Tm9 were scaled in a  
740 relative manner determined by the ratio of synapse counts from EM connectome data (see  
741 below) [18].

742 In order to construct a flash model of T5 based on the flash responses of Tm1, Tm2, Tm4  
743 and Tm9, we parameterized responses to 20, 40, 80 and 160 ms flashes and constructed spa-  
744 tiotemporal receptive fields by taking the outer product with parameterized spatial receptive  
745 fields derived from white noise spatial filters with a spatial resolution of 2.25°. In order to

746 simulate responses to moving bars, we summed temporal responses at each location with  
747 appropriate temporal delays for the PD and ND directions. We did not explicitly model bar  
748 width (as we had Tm responses to full field flashes but not to different bar widths), hence  
749 the predictions for each model in Figure 7E are the same across the x-axis. Like the white  
750 noise model, relative scaling between Tm1, Tm2, Tm4 and Tm9 was determined by the ratio  
751 of synapse counts from connectome data (see below) [18]. Spatial receptive fields were those  
752 extracted from white noise. We did not include static nonlinearities, as our recorded flash  
753 responses already represent the nonlinear processing properties of each cell.

## 754 Direction Selectivity Index

755 In order to match measurements of direction selectivity between our model output and  
756 those used in the T5 datasets, we use two metrics that we call  $DSI_{\max}$  and  $DSI_{\text{mag}}$ .

757 Wienecke et al. 2018 [20], inspired by [46], use the “peak-to-trough” response to calculate  
758  $DSI_{\text{mag}}$ :

$$DSI_{\text{mag}} = \frac{|PD| - |ND|}{|PD| + |ND|} \quad (5)$$

759 where  $|PD|$  represents the response magnitude to motion in the preferred direction, and  
760 response magnitude was calculated as 95th percentile minus 5th percentile. This works well  
761 to characterize steady-state responses to sine waves, and this metric is used in Figure 7C  
762 for *both* the Wienecke et al. [20] T5 sine wave data and the Gruntman et al. [8] T5 sine  
763 wave data. However, this measure is less amenable to transient flash responses.  $DSI_{\text{mag}}$   
764 ASAP2f values (Figure 7C) were provided by Wienecke et al. [20].  $DSI_{\text{mag}}$  values for T5  
765 electrophysiology sine wave data from [8] were calculated using average peak and average  
766 trough values for both PD and ND traces.

767 Gruntman et al. [7, 8] use the following metric to describe their flash responses:

$$DSI_{\max} = \frac{\max(PD) - \max(ND)}{\max(PD)} \quad (6)$$

768 where each response max is defined as the 0.995 quantile within the stimulus presentation  
769 window. However, this does not take into account the ND amplitude in the denominator,  
770 and is possibly susceptible to spuriously large DSI values due to noise [46]. We therefore use  
771 the following  $DSI_{\max}$  for flash responses:

$$DSI_{\max} = \frac{\max(PD) - \max(ND)}{\max(PD) + \max(ND)} \quad (7)$$

## 772 Connectome Data

773 T5 synapse-level connectomic data was accessed from the comprehensive electron-microscopy  
774 (EM) reconstruction of inputs to T4 and T5 cells in the *Drosophila* optic lobe by Shi-  
775 nomiya et al. [18]. Detailed data from twenty reconstructed T5 cells is available, with  
776 synapse counts for each presynaptic cell Tm1, Tm2, Tm4, and Tm9 from various columns  
777 (<https://flyem.dvid.io/fib19-grayscale>). For a given T5 cell, we summed the synapse

778 counts for each input (e.g. the synapse counts of Tm9 from column “K” and Tm9 column  
779 “C” were summed) and calculated the relative ratio of each of the four cell types. As re-  
780 ported in the study, Tm9 cells were consistently clustered on the leading edge of a given T5  
781 cell, while Tm1, Tm2 and Tm4 cell synapses were clustered in the center of T5 dendrites.  
782 We therefore made the reasonable assumption that all synapse counts for each cell from var-  
783 ious columns should be treated as a single offset (Tm9) or centered unit (Tm1,Tm2,Tm4).  
784 Twenty model instances were generated with these relative weight ratios, and the average PD  
785 tuning, ND tuning and DSI tuning were calculated (Figure 7B-C). The same approach was  
786 applied to flash models (Figure 7D-E). While a wide range of relative weight combinations  
787 confer direction selectivity on T5, we found that EM-based synaptic counts provide good fits  
788 across multiple models, suggesting that they are a reasonable estimation of synaptic weights  
789 in this system.

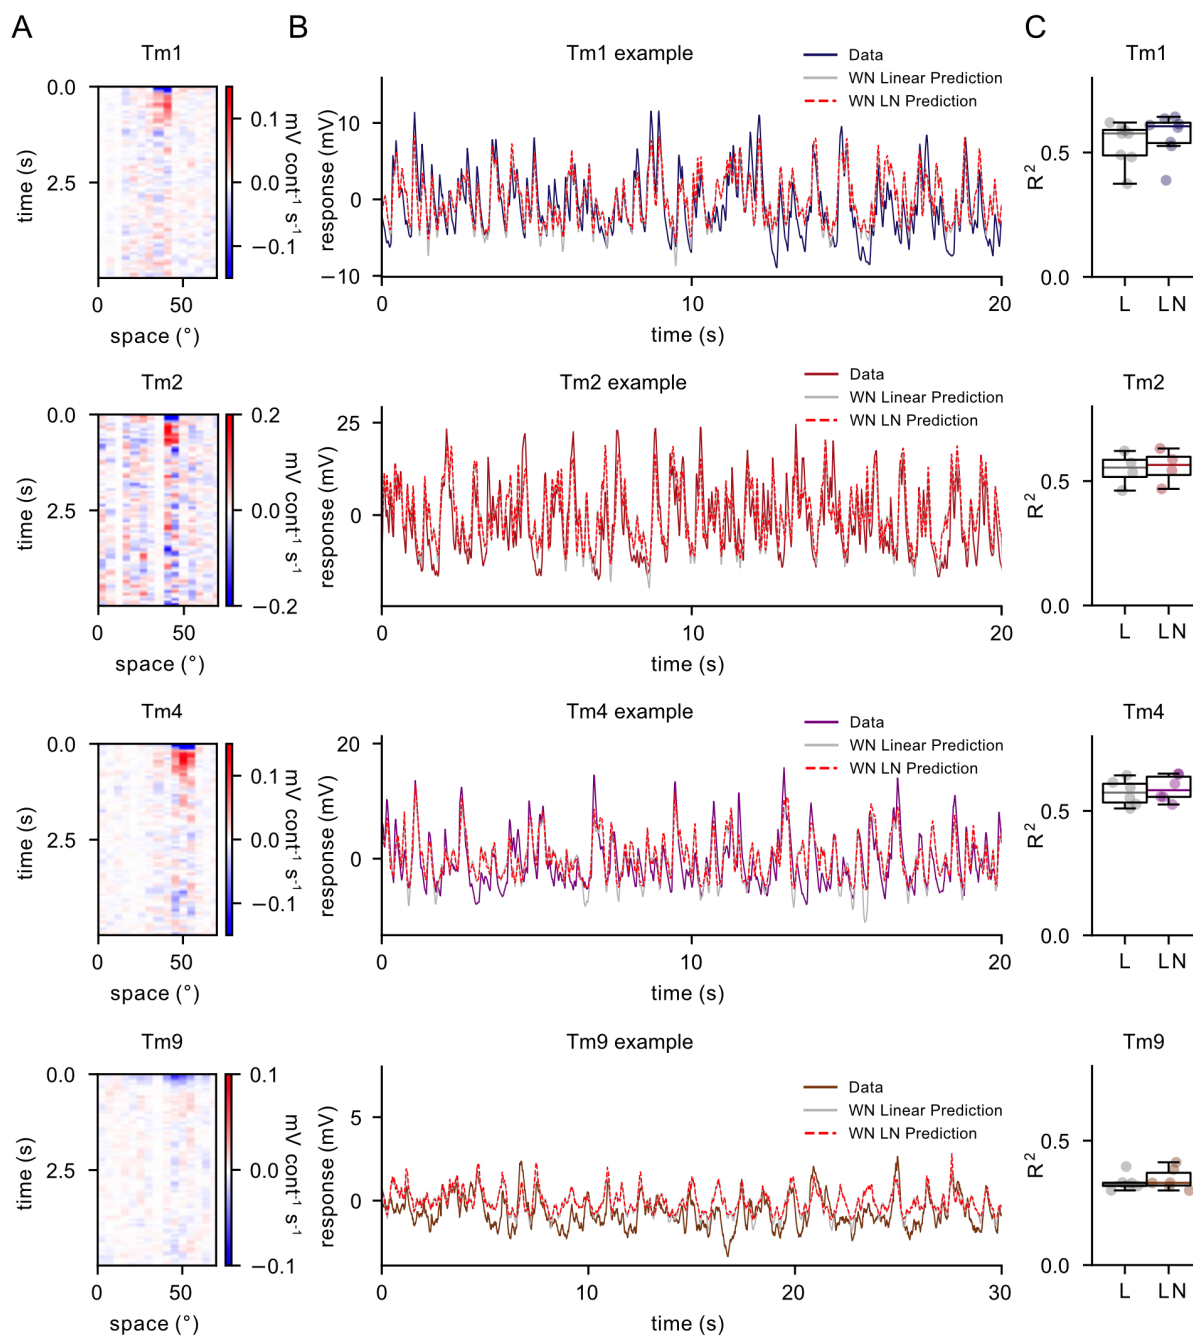

Figure S1: **White Noise Analysis** **A.** Example white noise spatiotemporal linear filters extracted for single Tm1, Tm2, Tm4 and Tm9 neurons. **B.** Comparison of raw data (colored line), white noise filter linear prediction (grey line) and the white noise filter linear-nonlinear (LN) prediction (dashed red line) for the same neurons as in A. **C.**  $R^2$  values are comparable between linear and linear-nonlinear (LN) predictions for all cells.

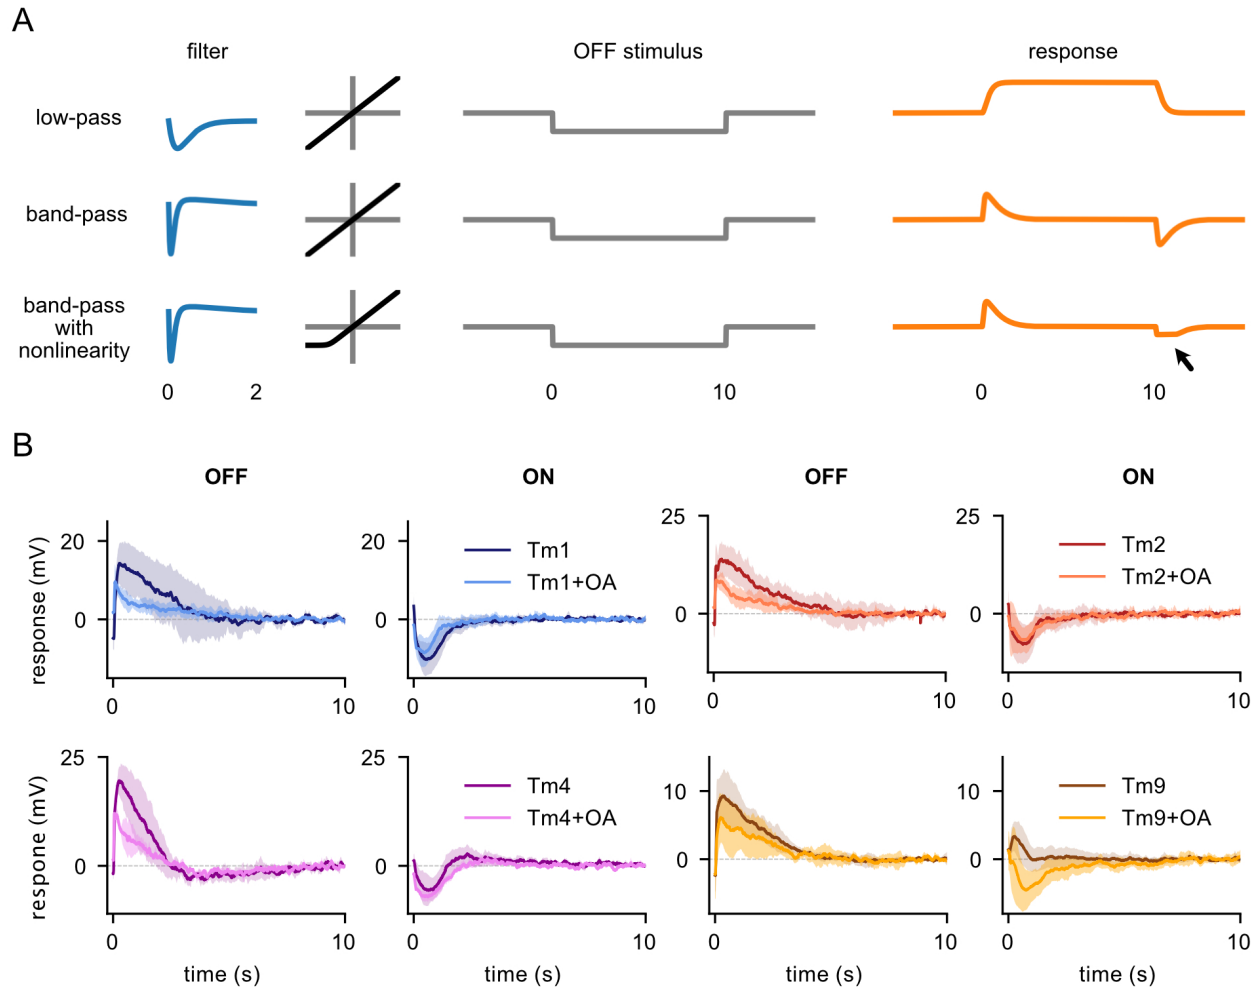

**Figure S2: Long OFF and ON responses exhibit band-pass properties and are partially rectified**  
**A.** A low-pass filter (*top*) produces a response that fails to return to baseline until the stimulus ends, while a band-pass filter produces a response that returns to baseline during the course of a long stimulus. A linear band-pass filter produces symmetric responses to OFF and ON stimuli (*middle*), while a partially rectified band-pass filter produces asymmetric response to OFF and ON stimuli (*bottom*) **B.** Tm1 (n=4 saline, n=4 OA), Tm2 (n=6, n=4), Tm4 (n=4, n=2) and Tm9 (n=11, n=10) responses to 10 s OFF flashes and 10 s ON flashes in saline and in OA. All four neurons return to baseline during the flashes and therefore exhibit band-pass properties. They all show partial rectification in their ON responses. Tm9s presented more variability in their responses, with some cells showing depolarizing ON responses, resulting in depolarizing ON average.

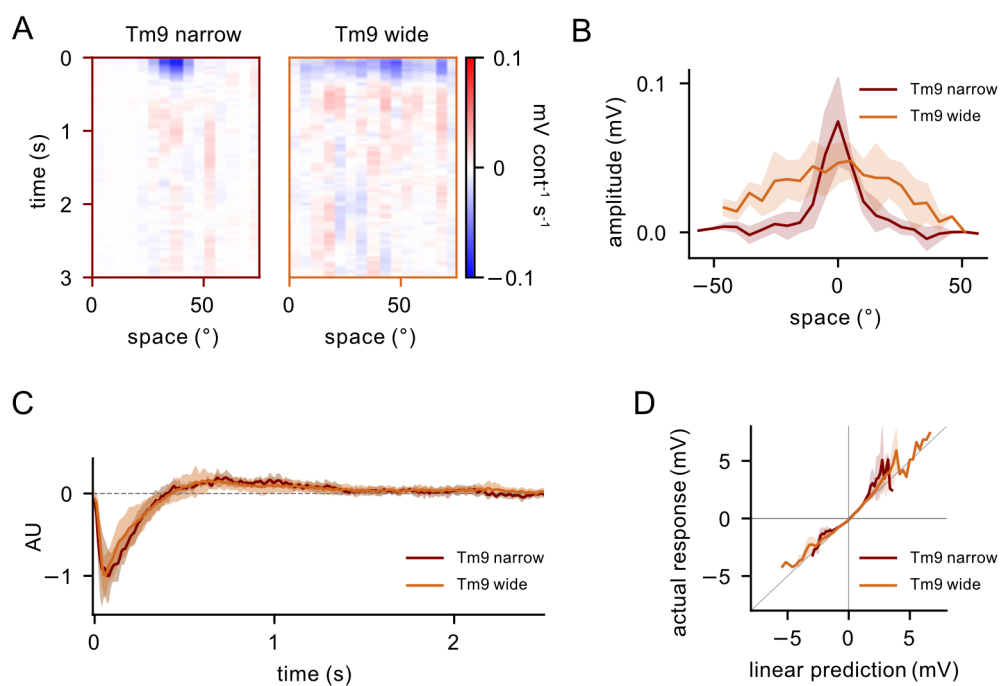

Figure S3: **Tm9 cells fall into two clusters with narrow and wide spatial receptive fields** **A.** Example spatiotemporal receptive fields for narrow (n=6) and wide (n=8) Tm9 cells **B.** Narrow and wide spatial receptive fields (FWHM=15.4°, FWHM=60.3° when fit with a Gaussian) **C.** Temporal filters do not significantly differ **D.** Static nonlinearities do not significantly differ.

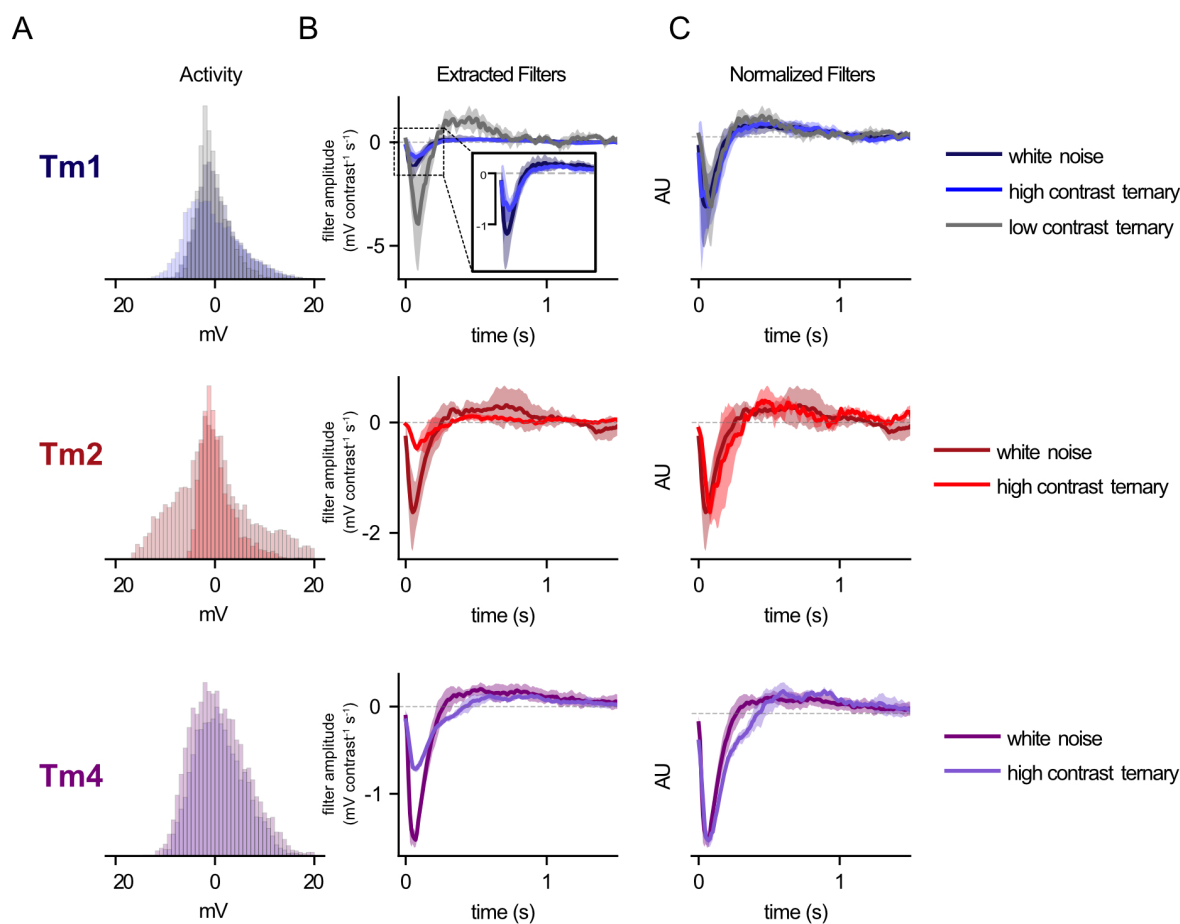

Figure S4: **Tm1, Tm2 and Tm4 exhibit gain contrast adaptation** **A**. Histogram of response values across conditions. Different conditions elicit responses in the same general dynamic range, although low contrast responses overall have slightly lower amplitude **B**. Average temporal filters extracted from truncated white noise ( $\mu = 0$ ,  $\sigma = 1$ , truncated at  $\pm 1$ ), high contrast ternary noise (values randomly selected from +1, -1 and 0) for Tm1 ( $n=4$ ), Tm2 ( $n=2$ ) and Tm4 ( $n=2$ ), white noise (same data as in Fig. 2A), and low contrast ternary noise (values randomly selected from +0.1, -0.1 and 0) for Tm1 ( $n=4$ ). Filter amplitude differences indicate gain adaptation so that response of cell is within similar dynamic range regardless of contrast. While this is especially evident in the case of the low contrast ternary noise-extracted Tm1 filter (*top*, grey trace), the same effect can be seen between high contrast ternary noise and the Gaussian white noise (lower contrast)-extracted filters for Tm1 (*inset*), Tm2, and Tm4. **C**. When scaled, filters do not show strong differences in shape



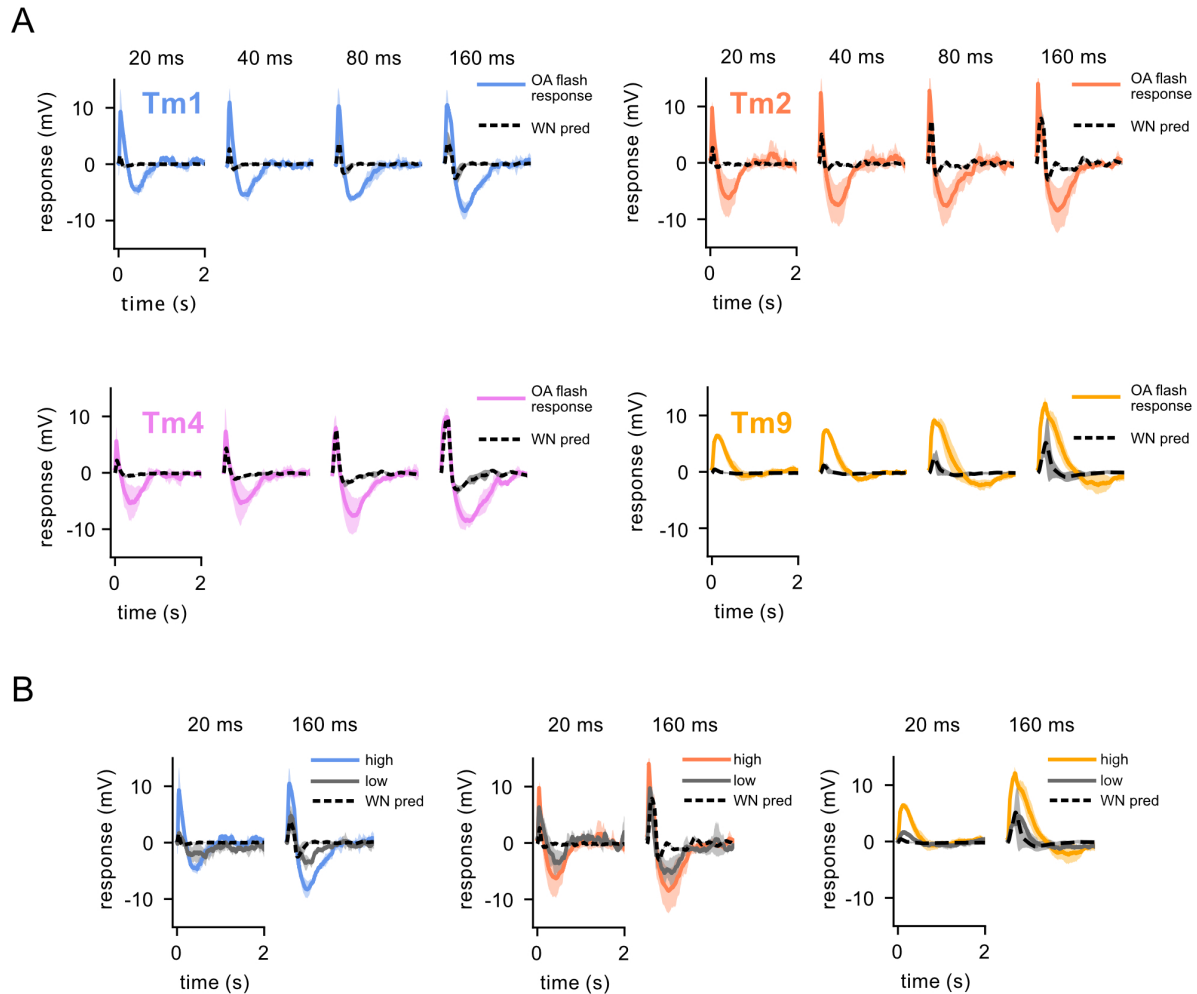

Figure S5: **Tm1, Tm2, Tm4 and Tm9 flash responses in OA** **A**. Flash responses of T5 columnar inputs to 20, 40, 80, and 160 ms flashes in the presence of OA, with OA white noise filter predictions superimposed (black dashed line). Same data as in Figure 4E **B**. Tm1, Tm2, and Tm9 responses to flashes of high vs. low contrast ( $n=4$ ,  $n=3$ ,  $n=2$ , respectively) in the presence of OA. OA white noise filter predictions superimposed (black dashed line).

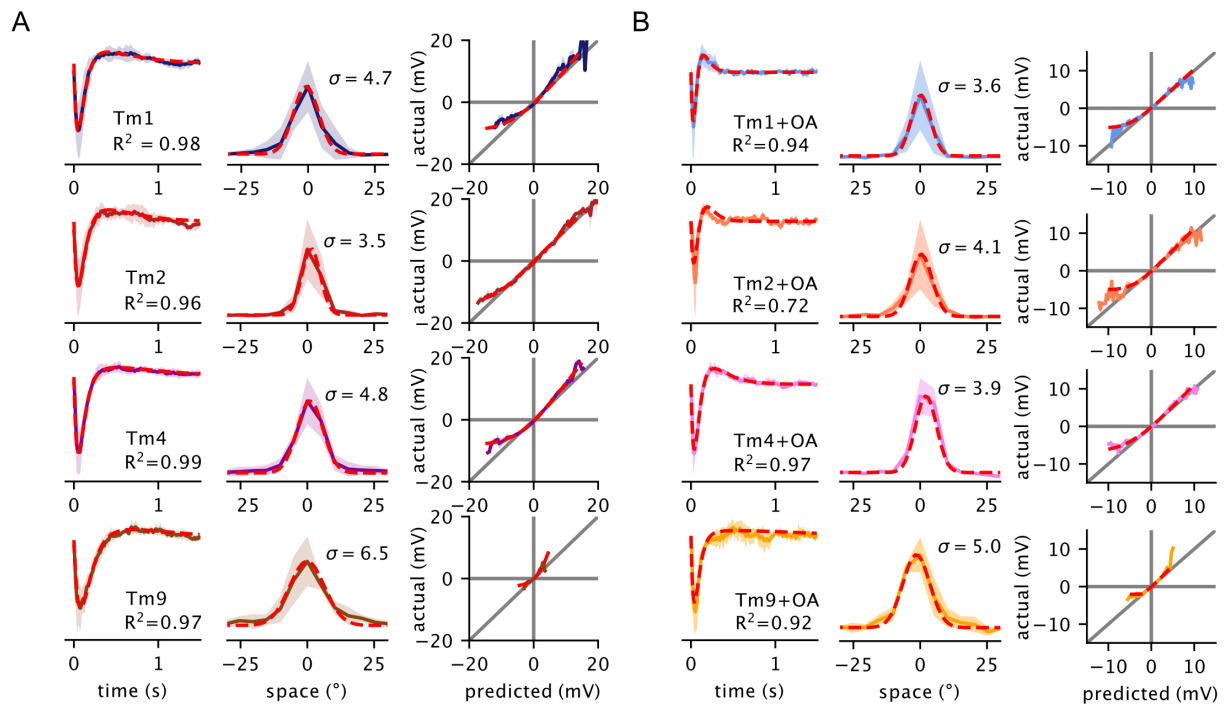

Figure S6: **Parameterization of white noise filters** **A.** Parameterization of white noise temporal (*left*), spatial filters (*middle*), and static nonlinearities (*right*). Same traces as in Figure 2, with parameterization superimposed (red dashed line) **B.** Same for OA, with traces from Figure 4.

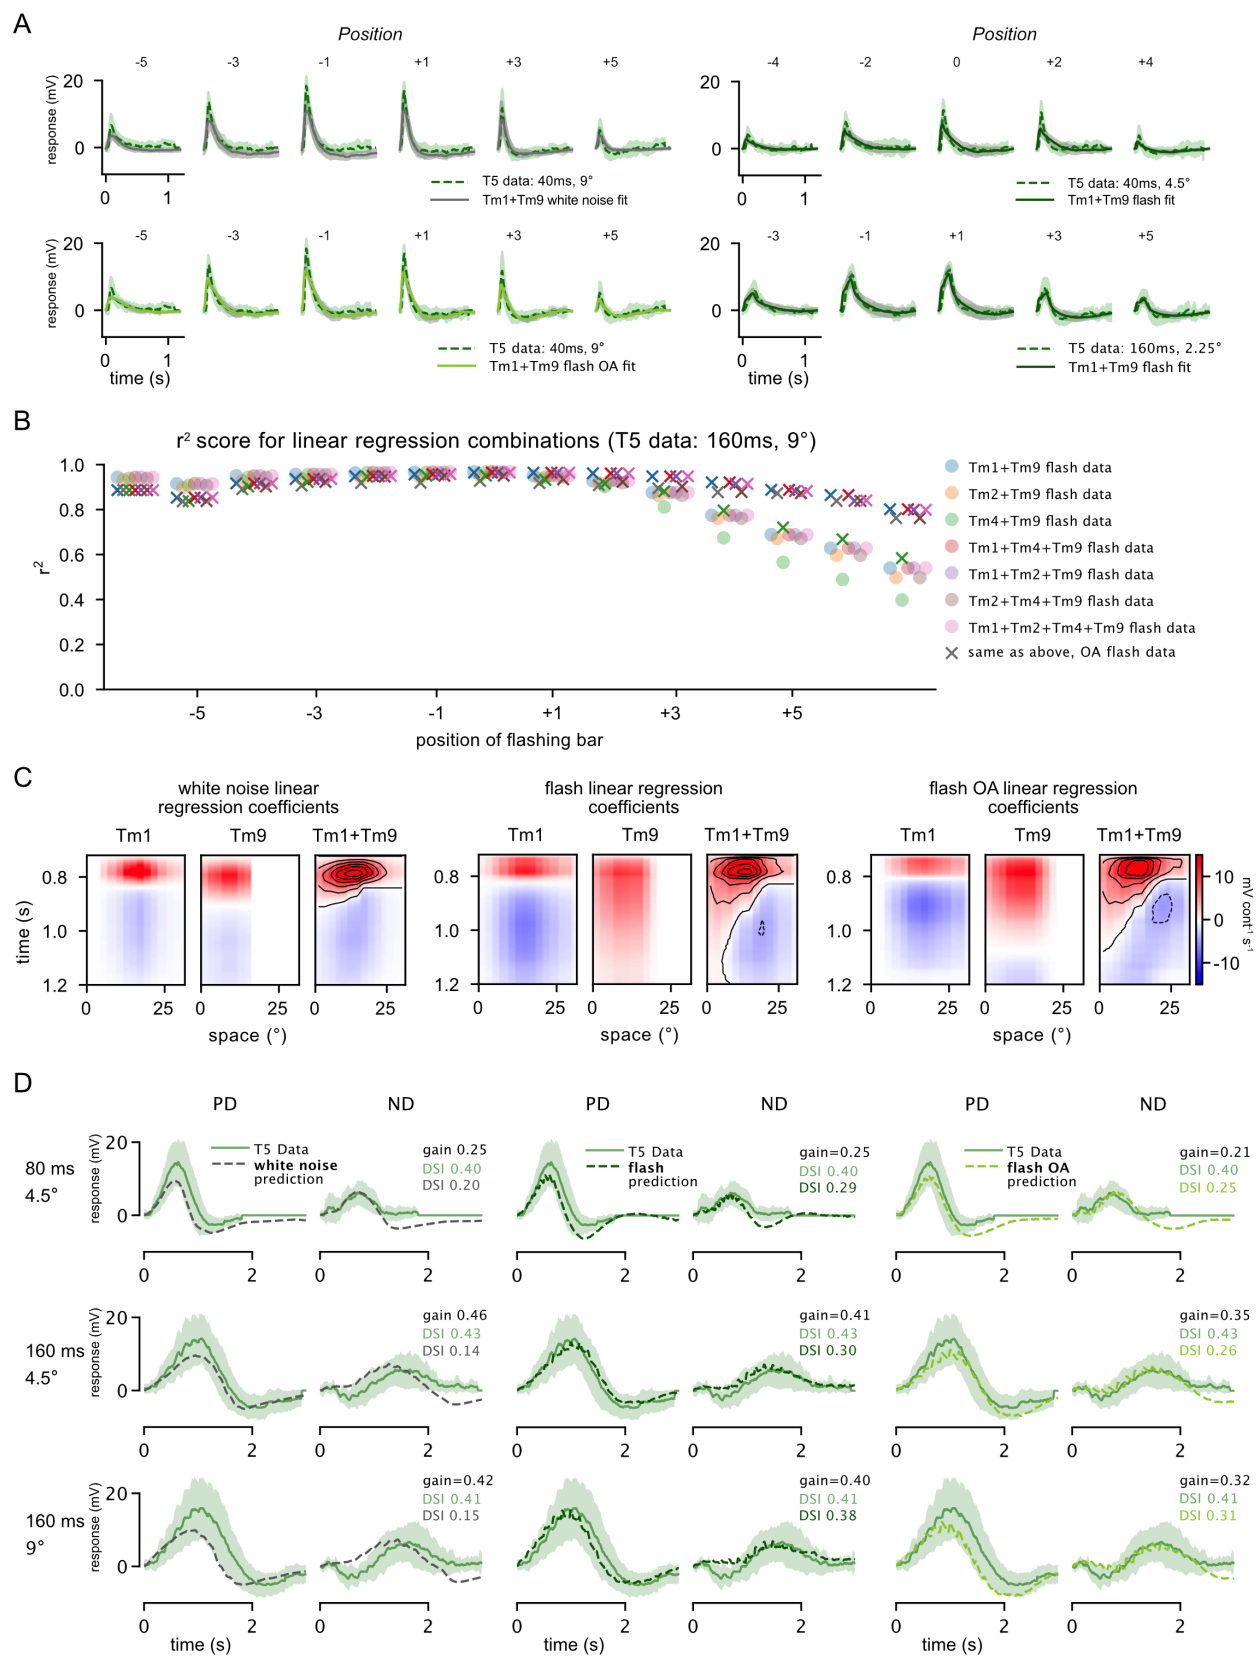

Figure S7: **Extended linear regression analysis A.** Four examples of linear regressions from individual stimulus conditions varying in the length of stimulation (40 ms and 160 ms), as well as stimulus size ( $9^\circ$ ,  $4.5^\circ$ , and  $2.25^\circ$ ). T5 data from Gruntman et al. [8]. **B.** In Figure 6, we chose to apply linear regression with Tm1 and Tm9. Combinations of Tm1, Tm2, and Tm4 with Tm9 perform approximately equally well (saline fits shown in circles, OA fits shown with crosses). **C.** Tm1 and Tm9 weighted by linear regression coefficients at each spatial location in the 160 ms,  $9^\circ$  condition, for the three fits enumerated in Figure 6 (using white noise filter predictions, flash responses, and flash OA responses, see Methods). The weighted Tm1 and Tm9 components are summed to generate a representative spatiotemporal receptive field (*right of each panel*). **D.** Gruntman et al. [8] recorded T5 responses to moving bars across multiple stimulus conditions (20, 40, 80, and 160 ms duration and  $2.25^\circ$ ,  $4.5^\circ$ , and  $9^\circ$  bar width). Linear regression coefficients fit to static flashes across conditions (160 ms,  $4.5^\circ$  and  $9^\circ$ ) predict T5 moving bar temporal responses (see Methods). In particular, the Tm1 and Tm9 flash data in the baseline saline condition and OA condition match the T5 electrophysiology traces, as well as DSI (*center column, right column*). Note that both PD and ND traces are scaled by a single “gain” factor (see Methods).

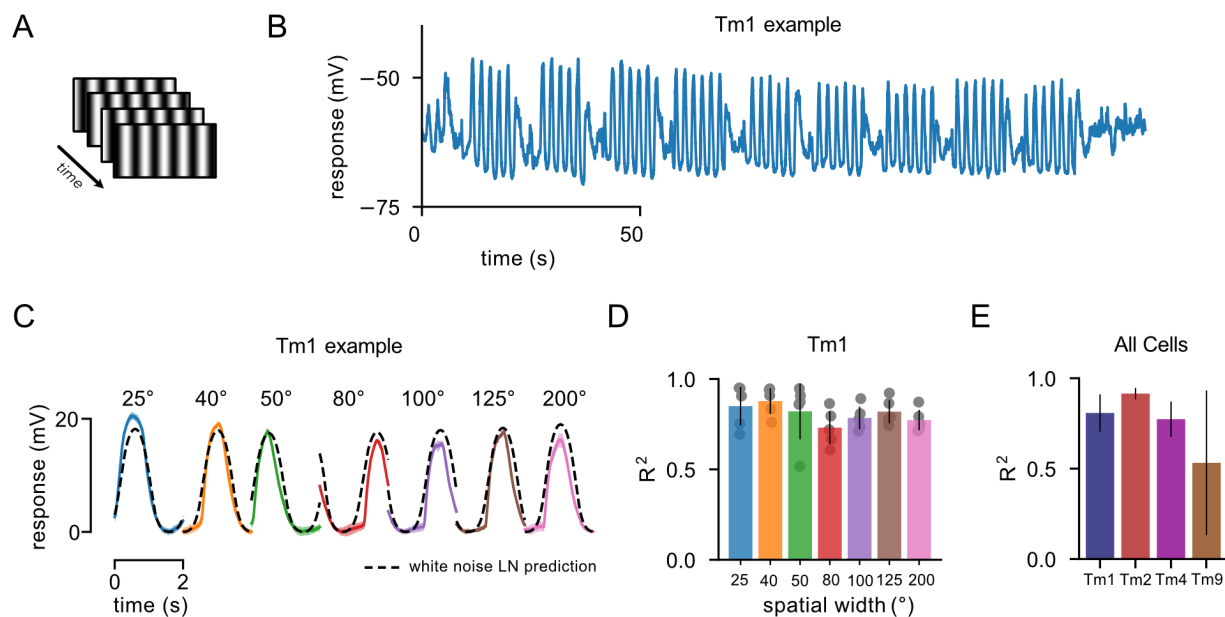

Figure S8: **Drifting grating responses are well predicted by white noise filters A.** Drifting gratings with 0.5 Hz temporal frequency and with varying spatial frequencies were shown **B.** Raw drifting grating response for example Tm1 cell **C.** Averaged periodic responses for each spatial frequency (colored traces for a single example Tm1 cell). A linear-nonlinear prediction based on the corresponding spatiotemporal white noise filter captures the temporal aspects of the response (dashed black line). **D.**  $R^2$  responses for each stimulus condition across Tm1 cells ( $n=5$ ). The match between predicted and actual responses indicates that using a white noise filter linear-nonlinear framework to model T5 responses to drifting gratings is reasonable. **E.**  $R^2$  responses for Tm1 ( $n=5$ ), Tm2 ( $n=1$ ), Tm4 ( $n=2$ ) and Tm9 ( $n=2$ ) averaged across stimulus conditions.
